# Supplementary material for: Bright green PhOLEDs using cyclometalated diiridium(iii) complexes with bridging oxamidato ligands as phosphorescent dopants
Source: Royal Society of Chemistry journal article supplement (doi:10.1039/c7tc00628d), 2017-01-01

## Supporting Information

### **Bright Green PhOLEDs Using Cyclometalated Iridium(III) Complexes with Bridging Oxamidato Ligands as Phosphorescent Dopants**

Ahmed M'hamedi,<sup>†</sup> Mark A. Fox,<sup>‡</sup> Andrei S. Batsanov,<sup>‡</sup> Hameed A. Al-Attar,<sup>§</sup> Andrew P. Monkman<sup>§</sup>  
and Martin R. Bryce<sup>\*,‡</sup>

<sup>†</sup> *Laboratory of Structure Determination, Development, and Application of Molecular Material, Department of Chemistry, University of Abdelhamid Ibn Badis BP 227, Mostaganem 27000 Algeria*

<sup>‡</sup> *Department of Chemistry, Durham University, South Road, Durham, DH1 3LE, UK*

<sup>§</sup> *Department of Physics, Durham University, South Road, Durham, DH1 3LE, UK*

| <b>Contents</b>              | <b>Page</b> |
|------------------------------|-------------|
| <b>X-Ray crystallography</b> | <b>S2</b>   |
| <b>Computations</b>          | <b>S5</b>   |
| <b>Mass Spectra</b>          | <b>S12</b>  |
| <b>Thermal analysis</b>      | <b>S13</b>  |
| <b>PhOLED data</b>           | <b>S15</b>  |
| <b>NMR Spectra</b>           | <b>S16</b>  |

## X-ray crystallography

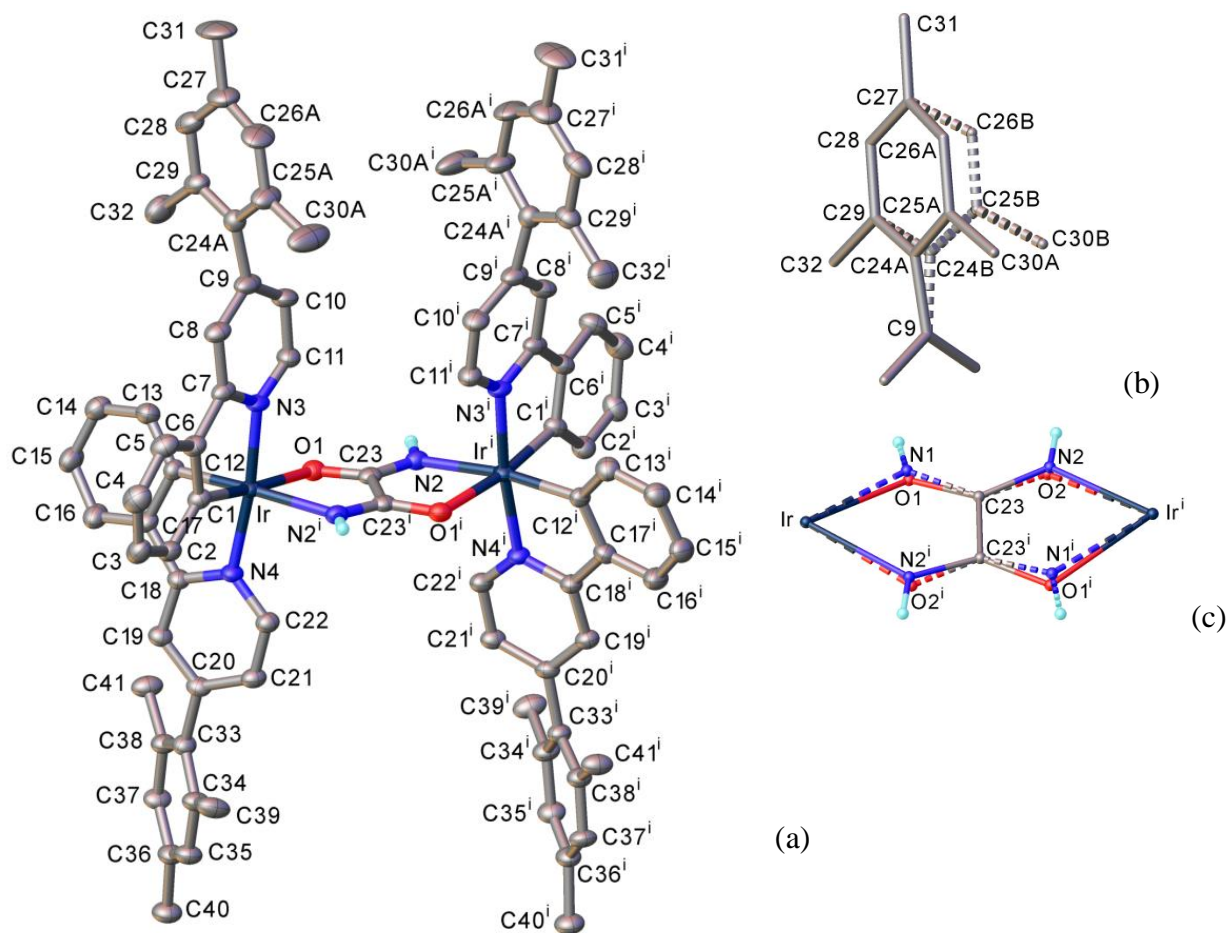

**Figure S1.** (a) Molecular structure of **5** (major component), (b) disorder of the mesityl group. (c) disorder of the bridging system. Here and below atomic displacement ellipsoids are shown at the 50% probability level. H atoms, except oxamidato, are omitted for clarity. Primed atoms were generated by a crystallographic twofold axis (transformation  $\frac{1}{2} -x, y, 1-z$ ).

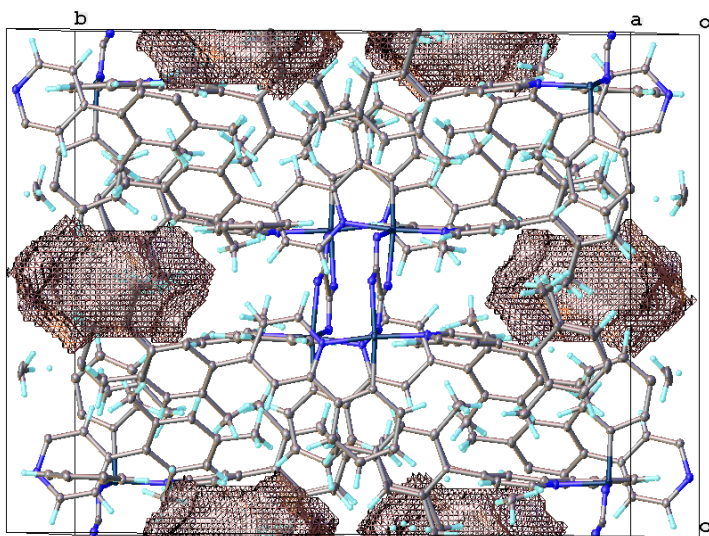

**Figure S2.** Solvent-accessible voids in the structure of **5**, presumably occupied by disordered hexane molecules.

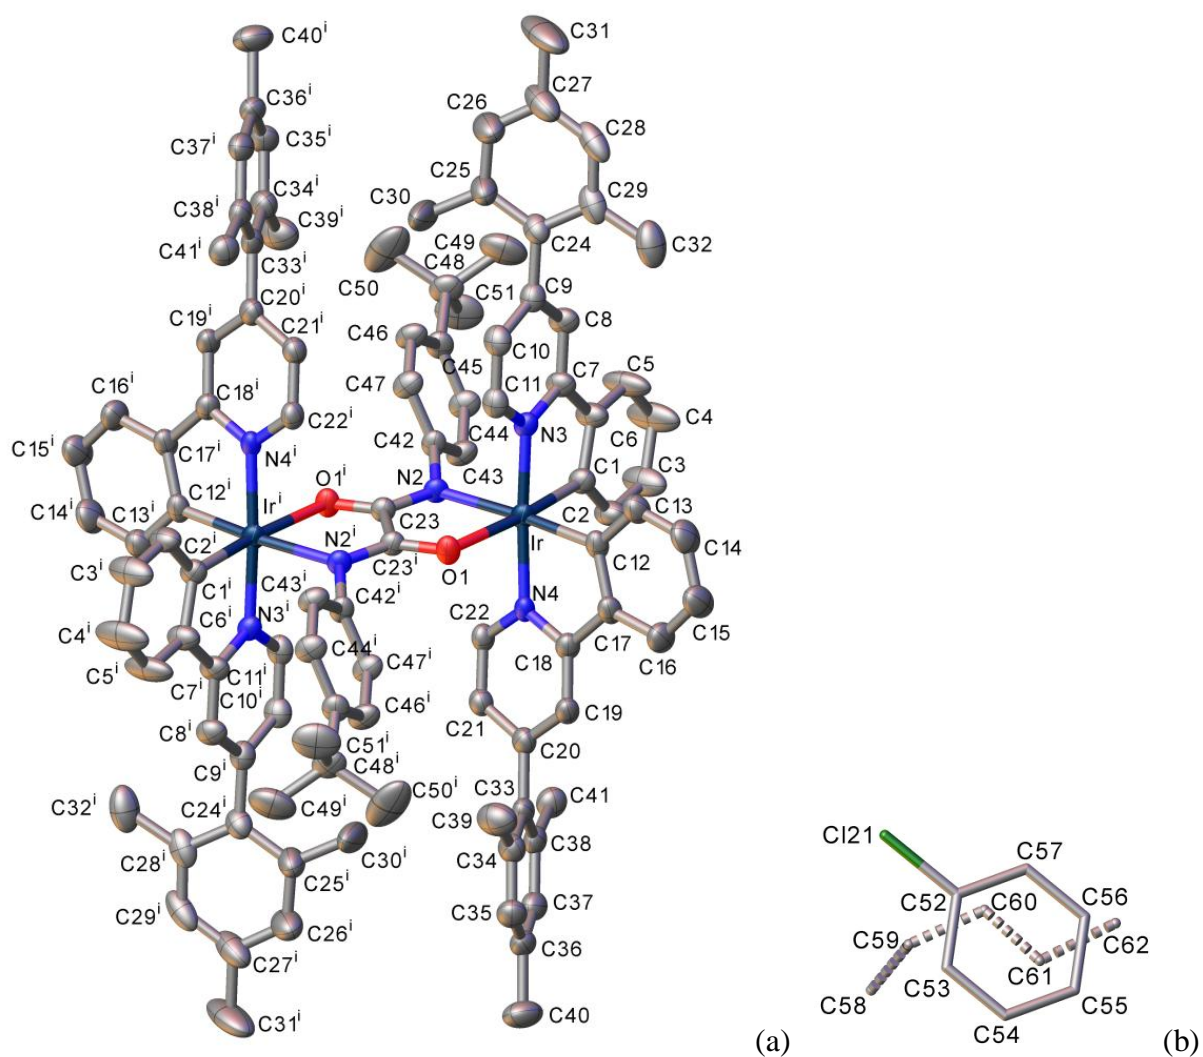

**Figure S3.** (a) Molecular structure of **6**; (b) disorder of chlorobenzene and pentane of crystallisation.

**Table S1.** Crystal data for **5** and **6**

| Compound                               | <b>5</b> ·hexane                                                              | <b>6</b> ·PhCl·pentane                                                            |
|----------------------------------------|-------------------------------------------------------------------------------|-----------------------------------------------------------------------------------|
| CCDC                                   | 1521969                                                                       | 1521970                                                                           |
| Formula                                | C <sub>88</sub> H <sub>88</sub> Ir <sub>2</sub> N <sub>6</sub> O <sub>2</sub> | C <sub>113</sub> H <sub>115</sub> ClIr <sub>2</sub> N <sub>6</sub> O <sub>2</sub> |
| $D_{calc.}/\text{g cm}^{-3}$           | 1.546                                                                         | 1.420                                                                             |
| $\mu/\text{mm}^{-1}$                   | 3.48                                                                          | 2.91                                                                              |
| Formula Weight                         | 1646.04                                                                       | 2008.95                                                                           |
| Size/mm <sup>3</sup>                   | 0.05×0.03×0.02                                                                | 0.08×0.06×0.05                                                                    |
| $T/\text{K}$                           | 100                                                                           | 120                                                                               |
| Crystal System                         | monoclinic                                                                    | triclinic                                                                         |
| Space Group                            | $I2/a$ (#15)                                                                  | $P-1$ (#2)                                                                        |
| $a/\text{Å}$                           | 15.122(3)                                                                     | 12.0305(6)                                                                        |
| $b/\text{Å}$                           | 24.292(4)                                                                     | 12.8786(6)                                                                        |
| $c/\text{Å}$                           | 19.265(5)                                                                     | 16.9004(8)                                                                        |
| $\alpha/^\circ$                        | 90                                                                            | 73.088(2)                                                                         |
| $\beta/^\circ$                         | 92.237(2)                                                                     | 70.775(2)                                                                         |
| $\gamma/^\circ$                        | 90                                                                            | 78.292(2)                                                                         |
| $V/\text{Å}^3$                         | 7071(3)                                                                       | 2348.8(2)                                                                         |
| $Z$                                    | 4                                                                             | 1                                                                                 |
| $\Theta_{max}/^\circ$                  | 29.6                                                                          | 26.4                                                                              |
| Refls. total/unique                    | 42109, 10354                                                                  | 37364, 9580                                                                       |
| Reflections with $I > 2\sigma(I)$      | 7944                                                                          | 7606                                                                              |
| $R_{int}$                              | 0.044                                                                         | 0.051                                                                             |
| Parameters/restraints                  | 440, 10                                                                       | 619, 577                                                                          |
| $\Delta\rho$ max/min, $\text{eÅ}^{-3}$ | 1.70, -1.87                                                                   | 1.36, -0.80                                                                       |
| $wR_2$ (all data)                      | 0.083                                                                         | 0.086                                                                             |
| $R_1$ [ $I > 2\sigma(I)$ data]         | 0.034                                                                         | 0.038                                                                             |

## Computations

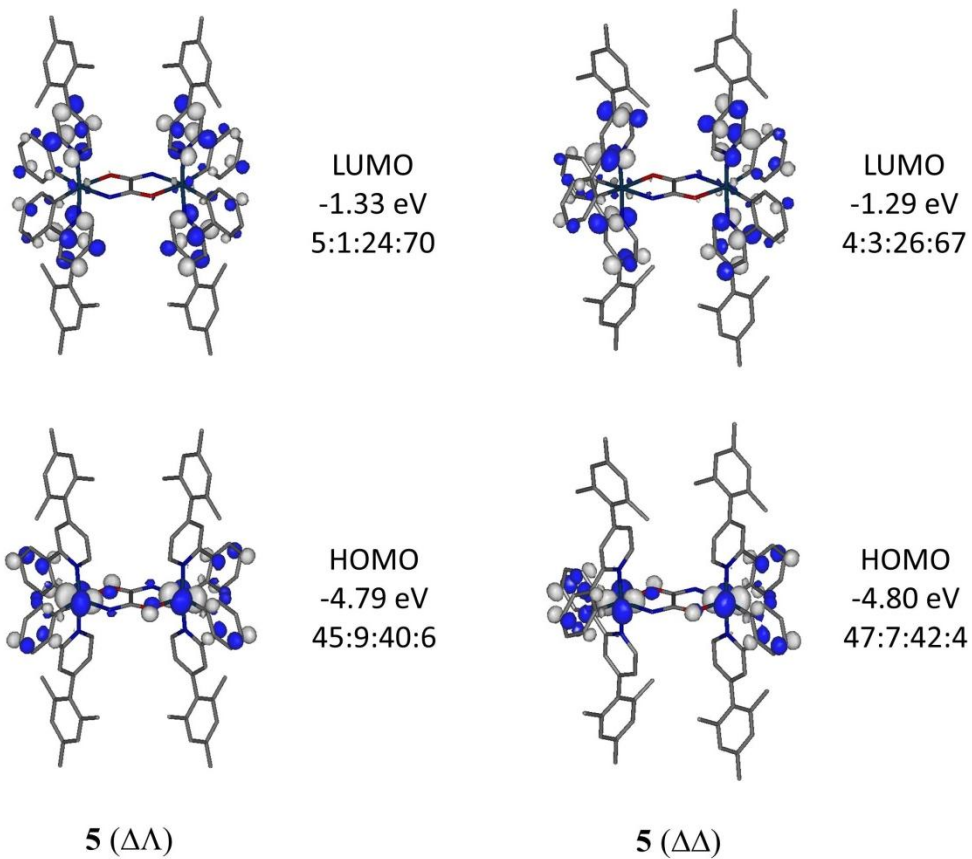

**Figure S4.** Frontier orbitals for **5**( $\Delta\Delta$ ) and **5**( $\Delta\Lambda$ ). Contour values are plotted at  $\pm 0.035$  e bohr<sup>-3</sup>. The Ir:bridge:phenyl:pyridyl ratios represent the atom/group MO contributions in percentages.

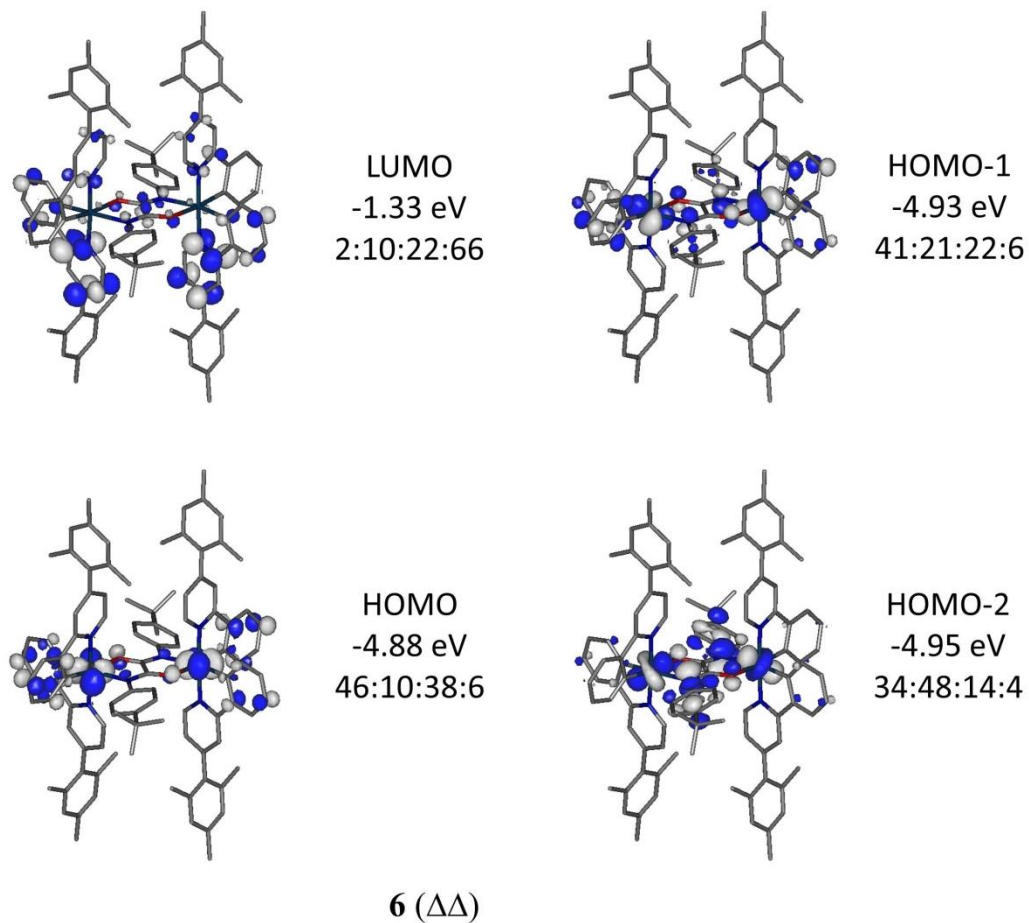

**Figure S5.** Important orbitals for **6(ΔΔ)**. Contour values are plotted at  $\pm 0.035$  e bohr<sup>-3</sup>. The Ir:bridge:phenyl:pyridyl ratios represent the atom/group MO contributions in percentages.

**Table S2.** Selected bond distances in Å for computed and experimental geometries of complexes **2**, **4**, **5** and **6**.

|                      | <b>2</b> ( $\Delta\Delta$ ) | <b>2</b> ( $\Delta\Delta$ ) | <b>4</b> ( $\Delta\Delta$ ) | <b>4</b> ( $\Delta\Delta$ ) | <b>5</b> ( $\Delta\Delta$ ) | <b>5</b> ( $\Delta\Delta$ ) | <b>6</b> ( $\Delta\Delta$ ) | <b>6</b> ( $\Delta\Delta$ ) |
|----------------------|-----------------------------|-----------------------------|-----------------------------|-----------------------------|-----------------------------|-----------------------------|-----------------------------|-----------------------------|
|                      | calc                        | expt <sup>a</sup>           | calc                        | expt <sup>b</sup>           | calc                        | expt                        | calc                        | expt                        |
| Ir-N(3)(OPy)         | 2.043                       | 2.030(5)                    | 2.063                       | 2.048(13)<br>2.025(13)      | 2.042                       | 2.042(3)                    | 2.047                       | 2.023(4)                    |
| Ir-N(4)(NPy)         | 2.058                       | 2.029(5)                    |                             | 2.052(13)<br>2.027(13)      | 2.058                       | 2.032(3)                    | 2.058                       | 2.040(4)                    |
| Ir-C(1)(OPh)         | 2.010                       | 1.993(5)                    | 2.011                       | 1.992(17)                   | 2.009                       | 1.993(4)                    | 2.017                       | 1.982(4)                    |
| Ir-C(12)(NPh)        | 2.029                       | 2.008(6)                    |                             | 2.03(2)                     | 2.029                       | 2.013(3)                    | 2.020                       | 2.013(4)                    |
| Ir-O(1)              | 2.212                       | 2.20(2)                     |                             |                             | 2.209                       | 2.194(13)                   | 2.163                       | 2.184(3)                    |
| Ir-O(2)              |                             | 2.180(15)                   |                             |                             |                             | 2.19(2)                     |                             |                             |
| Ir-N(1)(br)          | 2.154                       | 2.18(2)                     |                             |                             | 2.152                       | 2.13(2)                     | 2.247                       | 2.147(3)                    |
| Ir-N(2)(br)          |                             | 2.132(15)                   |                             |                             |                             | 2.135(18)                   |                             |                             |
| N(1)-C(br)           | 1.315                       | 1.30(2)                     |                             |                             | 1.314                       | 1.30(3)                     | 1.332                       | 1.309(5)                    |
| N(2)-C(br)           |                             | 1.278(16)                   |                             |                             |                             | 1.307(19)                   |                             |                             |
| O(1)-C(br)           | 1.305                       | 1.30(2)                     |                             |                             | 1.305                       | 1.286(14)                   | 1.305                       | 1.269(5)                    |
| O(2)-C(br)           |                             | 1.299(16)                   |                             |                             |                             | 1.28(3)                     |                             |                             |
| C-C(br)              | 1.518                       | 1.523(12)                   |                             |                             | 1.517                       | 1.526(7)                    | 1.505                       | 1.514(8)                    |
| Ir-Cl                |                             |                             | 2.597                       | 2.529(5)                    |                             |                             |                             |                             |
| Ir-Cl                |                             |                             |                             | 2.529(4)                    |                             |                             |                             |                             |
| Ir...Ir <sup>2</sup> | 5.781                       | 5.718                       | 3.944                       | 3.812                       | 5.775                       | 5.688                       | 5.829                       | 5.726                       |

<sup>a</sup>M. Graf, R. Czerwieniec and K. Sünkel, *Zeit. Anorg. Allg. Chem.*, 2013, **639**, 1090–1094.

<sup>b</sup>D. Rota Martir, C. Momblona, A. Pertegás, D. B. Cordes, A. M. Z. Slawin, H. J. Bolink and E. Zysman-Colman, *ACS Appl. Mater. Interfaces*, 2016, **8**, 33907–33915.

**Table S3.** Orbital energies and % MO contributions for **4** ( $\Delta\Delta$ ).

|         | eV    | Symmetry       | Ir | Cl | Ph | Py | Mes |
|---------|-------|----------------|----|----|----|----|-----|
| LUMO +5 | -0.84 | A              | 0  | 0  | 12 | 86 | 2   |
| LUMO +4 | -0.94 | B <sub>3</sub> | 2  | 0  | 10 | 86 | 2   |
| LUMO +3 | -1.21 | B <sub>2</sub> | 6  | 1  | 22 | 69 | 2   |
| LUMO +2 | -1.31 | A              | 6  | 1  | 18 | 73 | 2   |
| LUMO +1 | -1.36 | B <sub>3</sub> | 4  | 1  | 24 | 69 | 2   |
| LUMO    | -1.37 | B <sub>1</sub> | 8  | 1  | 26 | 63 | 2   |
| HOMO    | -4.91 | A              | 44 | 6  | 44 | 6  | 0   |
| HOMO -1 | -4.98 | B <sub>2</sub> | 49 | 1  | 44 | 6  | 0   |
| HOMO -2 | -5.41 | B <sub>3</sub> | 62 | 18 | 8  | 12 | 0   |
| HOMO -3 | -5.47 | B <sub>2</sub> | 62 | 18 | 10 | 10 | 0   |
| HOMO -4 | -5.70 | B <sub>1</sub> | 52 | 2  | 26 | 20 | 0   |
| HOMO -5 | -5.83 | A              | 69 | 1  | 15 | 15 | 0   |



**Table S4.** Orbital energies and % MO contributions for **5** ( $\Delta\Delta$ ). NH = NHs at bridge, C<sub>2</sub> = carbons at bridge, NPh = phenyl *trans* to nitrogen at bridge, OPh = phenyl *trans* to oxygen at bridge, NPy = pyridyl group of ppy with NPh, OPy = pyridyl group of ppy with OPh.

|         | eV    | Symmetry       | Ir | NH | O  | C <sub>2</sub> | NPh | OPh | NPy | OPy | Mes |
|---------|-------|----------------|----|----|----|----------------|-----|-----|-----|-----|-----|
| LUMO +4 | -0.82 | A <sub>u</sub> | 2  | 2  | 1  | 2              | 6   | 6   | 36  | 43  | 2   |
| LUMO +3 | -1.18 | A <sub>u</sub> | 6  | 0  | 0  | 0              | 10  | 10  | 37  | 35  | 2   |
| LUMO +2 | -1.21 | A <sub>g</sub> | 6  | 0  | 0  | 0              | 10  | 8   | 42  | 32  | 2   |
| LUMO +1 | -1.27 | A <sub>g</sub> | 4  | 0  | 0  | 0              | 10  | 14  | 31  | 39  | 2   |
| LUMO    | -1.33 | A <sub>u</sub> | 5  | 0  | 0  | 1              | 12  | 12  | 34  | 34  | 2   |
| HOMO    | -4.79 | A <sub>g</sub> | 45 | 2  | 6  | 1              | 20  | 20  | 4   | 2   | 0   |
| HOMO -1 | -4.84 | A <sub>u</sub> | 45 | 1  | 2  | 0              | 22  | 22  | 4   | 4   | 0   |
| HOMO -2 | -5.06 | A <sub>g</sub> | 57 | 16 | 11 | 0              | 4   | 2   | 4   | 6   | 0   |
| HOMO -3 | -5.23 | A <sub>u</sub> | 57 | 10 | 14 | 1              | 4   | 4   | 4   | 6   | 0   |
| HOMO -4 | -5.61 | A <sub>g</sub> | 69 | 0  | 2  | 2              | 8   | 4   | 11  | 4   | 0   |
| HOMO -5 | -5.67 | A <sub>u</sub> | 47 | 0  | 0  | 2              | 19  | 12  | 12  | 8   | 0   |

**Table S5.** Orbital energies and % MO contributions for **5** ( $\Delta\Delta$ ).

|         | eV    | Symmetry | Ir | NH | O  | C <sub>2</sub> | NPh | OPh | NPy | OPy | Mes |
|---------|-------|----------|----|----|----|----------------|-----|-----|-----|-----|-----|
| LUMO +4 | -0.83 | A        | 4  | 3  | 2  | 3              | 4   | 4   | 38  | 40  | 2   |
| LUMO +3 | -1.19 | B        | 4  | 0  | 0  | 0              | 10  | 12  | 37  | 35  | 2   |
| LUMO +2 | -1.24 | A        | 6  | 0  | 0  | 0              | 10  | 10  | 40  | 32  | 2   |
| LUMO +1 | -1.27 | B        | 6  | 0  | 0  | 0              | 12  | 12  | 34  | 34  | 2   |
| LUMO    | -1.29 | A        | 4  | 1  | 1  | 1              | 12  | 14  | 30  | 35  | 2   |
| HOMO    | -4.80 | A        | 47 | 1  | 5  | 1              | 22  | 20  | 2   | 2   | 0   |
| HOMO -1 | -4.83 | B        | 45 | 1  | 2  | 0              | 22  | 22  | 4   | 4   | 0   |
| HOMO -2 | -5.10 | B        | 57 | 15 | 11 | 1              | 4   | 2   | 4   | 6   | 0   |
| HOMO -3 | -5.27 | A        | 59 | 10 | 15 | 1              | 3   | 4   | 4   | 4   | 0   |
| HOMO -4 | -5.61 | B        | 67 | 1  | 2  | 2              | 8   | 6   | 10  | 4   | 0   |
| HOMO -5 | -5.67 | A        | 59 | 1  | 3  | 3              | 12  | 6   | 10  | 6   | 0   |

**Table S6.** Orbital energies and % MO contributions for **6** ( $\Delta\Delta$ ). Bu = tBuC<sub>6</sub>H<sub>4</sub> group.

|         | eV    | Symmetry       | Ir | N  | O  | C <sub>2</sub> | Bu | NPh | OPh | NPy | OPy | Mes |
|---------|-------|----------------|----|----|----|----------------|----|-----|-----|-----|-----|-----|
| LUMO +6 | -0.81 | A <sub>u</sub> | 0  | 1  | 2  | 3              | 2  | 10  | 4   | 60  | 16  | 2   |
| LUMO +5 | -0.82 | A <sub>g</sub> | 2  | 0  | 0  | 0              | 0  | 12  | 2   | 76  | 6   | 2   |
| LUMO +4 | -1.08 | A <sub>u</sub> | 4  | 17 | 15 | 28             | 24 | 0   | 0   | 6   | 6   | 0   |
| LUMO +3 | -1.21 | A <sub>u</sub> | 6  | 0  | 0  | 0              | 0  | 6   | 16  | 20  | 50  | 2   |
| LUMO +2 | -1.23 | A <sub>g</sub> | 6  | 1  | 0  | 0              | 1  | 2   | 20  | 8   | 60  | 2   |
| LUMO +1 | -1.32 | A <sub>g</sub> | 4  | 0  | 1  | 0              | 0  | 20  | 4   | 61  | 8   | 2   |
| LUMO    | -1.38 | A <sub>u</sub> | 4  | 1  | 1  | 3              | 2  | 16  | 6   | 49  | 16  | 2   |
| HOMO    | -4.82 | A <sub>g</sub> | 39 | 9  | 7  | 1              | 18 | 10  | 12  | 2   | 2   | 0   |
| HOMO -1 | -4.91 | A <sub>u</sub> | 47 | 2  | 2  | 0              | 3  | 18  | 22  | 2   | 4   | 0   |
| HOMO -2 | -4.96 | A <sub>g</sub> | 39 | 11 | 6  | 1              | 15 | 8   | 14  | 2   | 4   | 0   |
| HOMO -3 | -5.14 | A <sub>u</sub> | 35 | 11 | 18 | 2              | 22 | 2   | 6   | 2   | 2   | 0   |
| HOMO -4 | -5.65 | A <sub>g</sub> | 70 | 0  | 2  | 2              | 2  | 6   | 6   | 6   | 6   | 0   |
| HOMO -5 | -5.73 | A <sub>u</sub> | 31 | 1  | 0  | 0              | 10 | 18  | 22  | 4   | 14  | 0   |
| HOMO -6 | -5.75 | A <sub>g</sub> | 2  | 1  | 1  | 0              | 3  | 41  | 36  | 8   | 8   | 0   |
| HOMO -7 | -5.77 | A <sub>g</sub> | 28 | 5  | 4  | 1              | 38 | 8   | 8   | 2   | 6   | 0   |

**Table S7.** Orbital energies and % MO contributions for **6** ( $\Delta\Delta$ ).

|         | eV    | Symmetry | Ir | N  | O  | C <sub>2</sub> | Bu | NPh | OPh | NPy | OPy | Mes |
|---------|-------|----------|----|----|----|----------------|----|-----|-----|-----|-----|-----|
| LUMO +6 | -0.79 | B        | 2  | 0  | 0  | 0              | 0  | 8   | 6   | 43  | 39  | 2   |
| LUMO +5 | -0.80 | A        | 2  | 1  | 1  | 3              | 2  | 8   | 4   | 55  | 22  | 2   |
| LUMO +4 | -1.11 | A        | 4  | 15 | 15 | 27             | 23 | 0   | 0   | 8   | 8   | 0   |
| LUMO +3 | -1.23 | B        | 4  | 0  | 0  | 0              | 0  | 8   | 16  | 22  | 48  | 2   |
| LUMO +2 | -1.27 | A        | 6  | 1  | 0  | 0              | 0  | 4   | 18  | 14  | 55  | 2   |
| LUMO +1 | -1.30 | B        | 6  | 0  | 0  | 0              | 0  | 16  | 8   | 46  | 22  | 2   |
| LUMO    | -1.33 | A        | 2  | 2  | 2  | 3              | 3  | 18  | 4   | 52  | 12  | 2   |
| HOMO    | -4.88 | A        | 46 | 2  | 4  | 1              | 3  | 17  | 21  | 2   | 4   | 0   |
| HOMO -1 | -4.93 | B        | 41 | 6  | 4  | 1              | 10 | 12  | 20  | 2   | 4   | 0   |
| HOMO -2 | -4.95 | B        | 34 | 14 | 6  | 2              | 26 | 8   | 6   | 2   | 2   | 0   |
| HOMO -3 | -5.18 | A        | 37 | 11 | 18 | 2              | 22 | 2   | 4   | 2   | 2   | 0   |
| HOMO -4 | -5.64 | B        | 67 | 1  | 2  | 2              | 2  | 6   | 6   | 8   | 6   | 0   |
| HOMO -5 | -5.72 | A        | 38 | 4  | 5  | 1              | 4  | 20  | 18  | 4   | 6   | 0   |
| HOMO -6 | -5.78 | A        | 18 | 0  | 0  | 0              | 4  | 30  | 28  | 8   | 12  | 0   |
| HOMO -7 | -5.78 | B        | 6  | 0  | 0  | 0              | 6  | 36  | 34  | 8   | 10  | 0   |

**Table S8.** TD-DFT data from optimised geometries of the complexes, **1**, **2**, **4**, **5** and **6** and comparison with observed lowest energy absorption bands and emission maxima.

|                              | TD-DFT<br>$S_0 \rightarrow S_1$<br>(nm) | Oscillator<br>strength<br>( <i>f</i> ) | TD-DFT<br>$S_0 \rightarrow T_1$<br>(nm) | Observed<br>$\lambda_{\text{abs}}$<br>(nm) | Observed<br>$\lambda_{\text{em}}$<br>(nm) | Observed<br>Stokes shift<br>( $\text{cm}^{-1}$ ) |
|------------------------------|-----------------------------------------|----------------------------------------|-----------------------------------------|--------------------------------------------|-------------------------------------------|--------------------------------------------------|
| <b>1</b> ( $\Delta\Lambda$ ) | 476                                     | 0.0112                                 | 506                                     | 497 <sup>a</sup>                           | 521 <sup>a</sup>                          | 930                                              |
| <b>1</b> ( $\Delta\Delta$ )  | 470                                     | 0.0200                                 | 498                                     | 497 <sup>a</sup>                           | 523 <sup>a</sup>                          | 1000                                             |
| <b>2</b> ( $\Delta\Lambda$ ) | 449                                     | 0.0405                                 | 488                                     | 498 <sup>b</sup>                           | 523 <sup>b</sup>                          | 960                                              |
| <b>2</b> ( $\Delta\Delta$ )  | 448                                     | 0.0409                                 | 490                                     | 498 <sup>b</sup>                           | 523 <sup>b</sup>                          | 960                                              |
| <b>4</b> ( $\Delta\Delta$ )  | 445                                     | 0.0685                                 | 485                                     | 492                                        | 518                                       | 1020                                             |
| <b>5</b> ( $\Delta\Lambda$ ) | 452                                     | 0.0673                                 | 490                                     | 500                                        | 529                                       | 1100                                             |
| <b>5</b> ( $\Delta\Delta$ )  | 448                                     | 0.0669                                 | 487                                     | 500                                        | 529                                       | 1100                                             |
| <b>6</b> ( $\Delta\Lambda$ ) | 449                                     | 0.0462                                 | 512                                     | 500                                        | 522                                       | 840                                              |
| <b>6</b> ( $\Delta\Delta$ )  | 441                                     | 0.0385                                 | 503                                     | 500                                        | 522                                       | 840                                              |

<sup>a</sup> Y. Zheng, A. S. Batsanov, M. A. Fox, H. A. Al-Attar, K. Abdullah, V. Jankus, M. R. Bryce and A. P. Monkman, *Angew. Chem. Int. Ed.*, 2014, **53**, 11616–11619.

<sup>b</sup> M. Graf, R. Czerwieńiec and K. Sünkel, *Zeit. Anorg. Allg. Chem.*, 2013, **639**, 1090–1094.

## Mass spectra

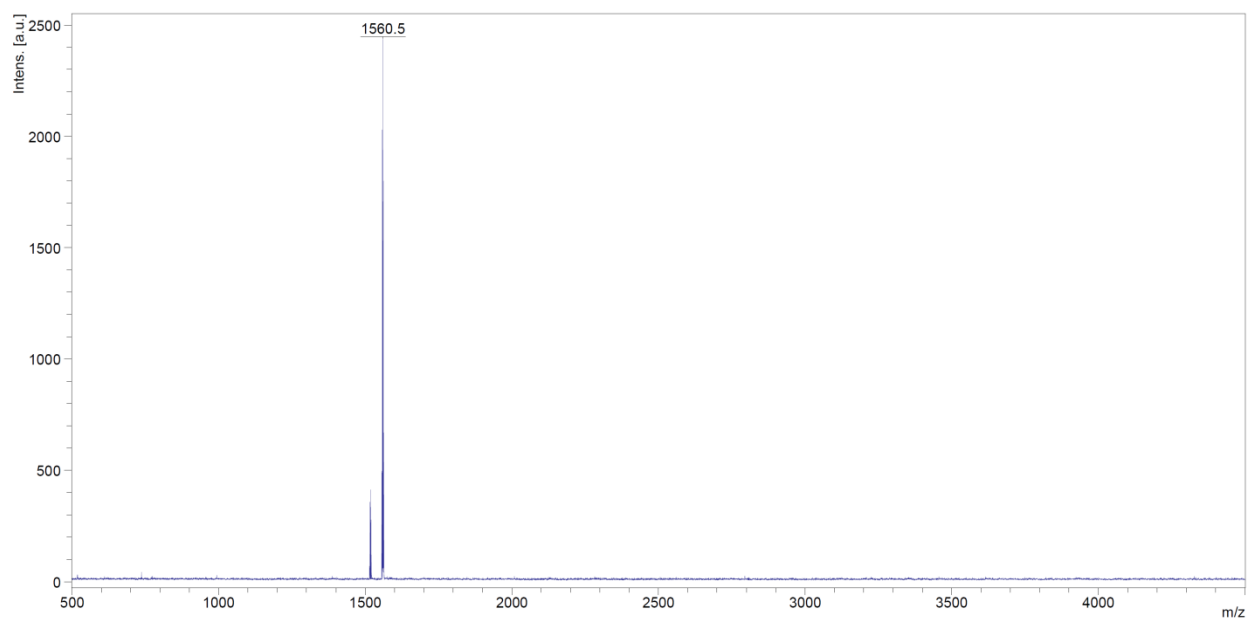

**Figure S6.** MALDI-TOF mass spectrum of complex **5**.

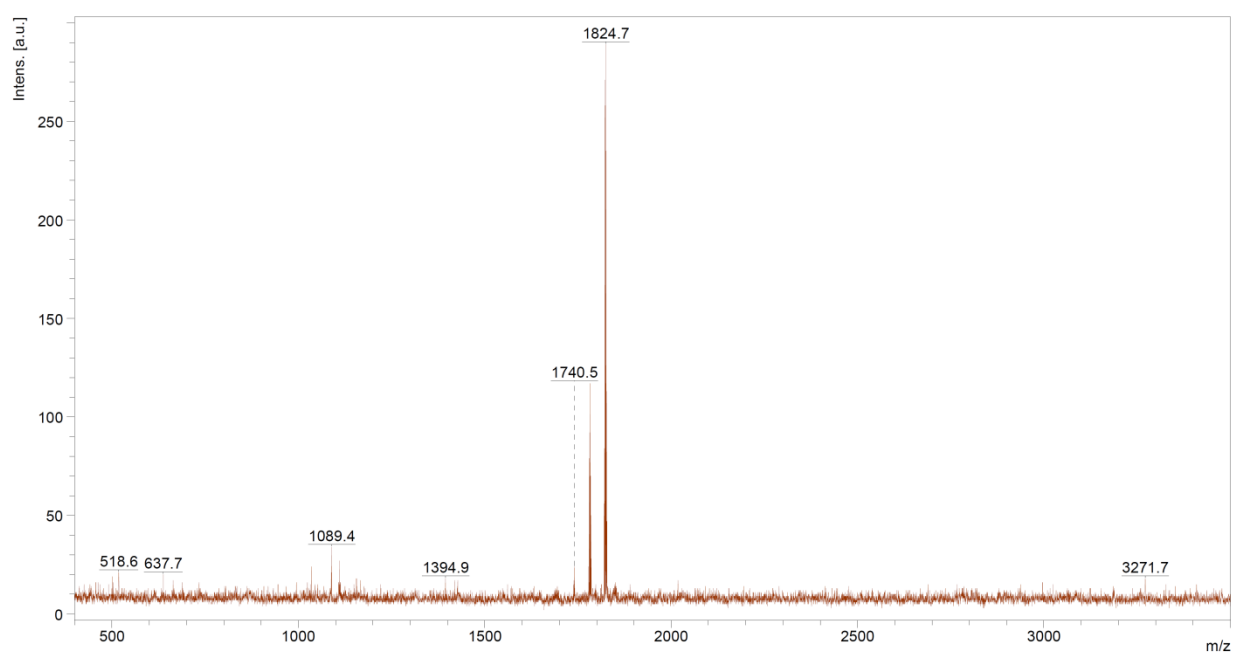

**Figure S7.** MALDI-TOF mass spectrum of complex **6**.

## Thermal analysis

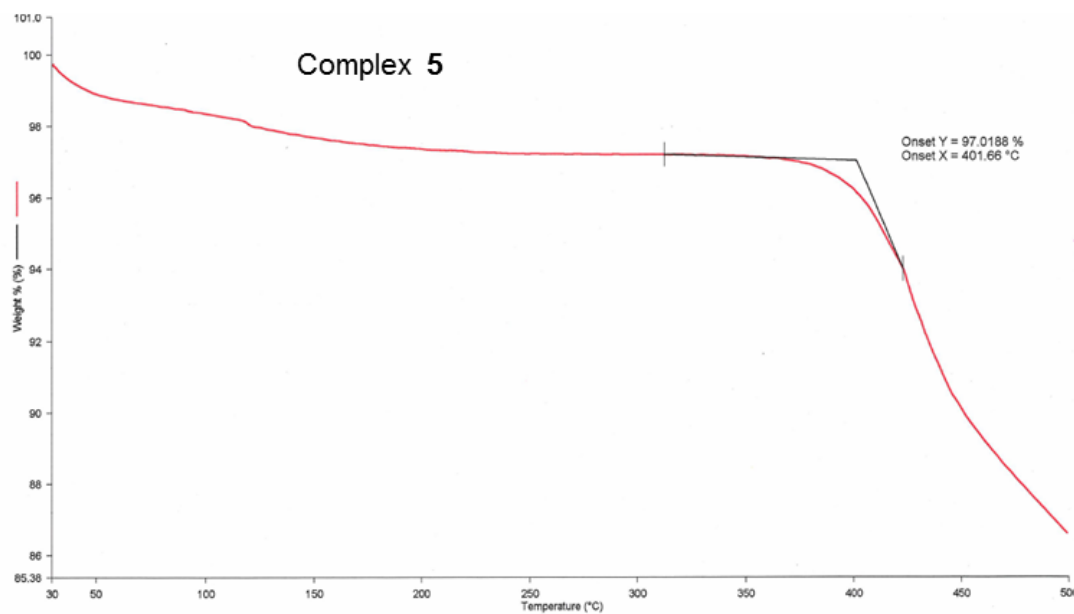

Figure S8. TGA trace of complex 5.

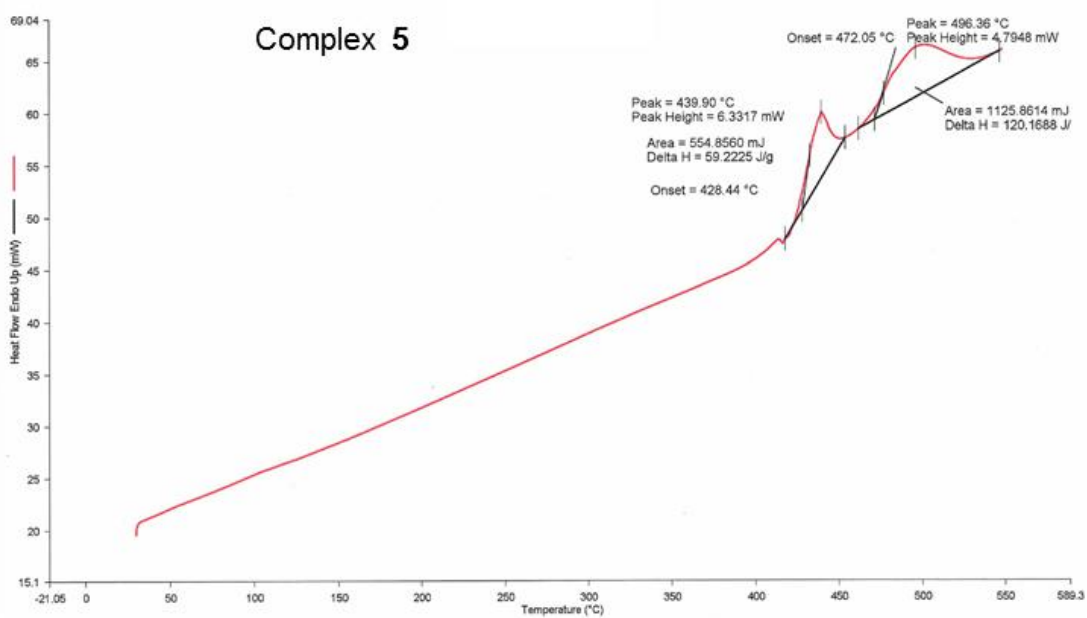

Figure S9. DSC trace of complex 5

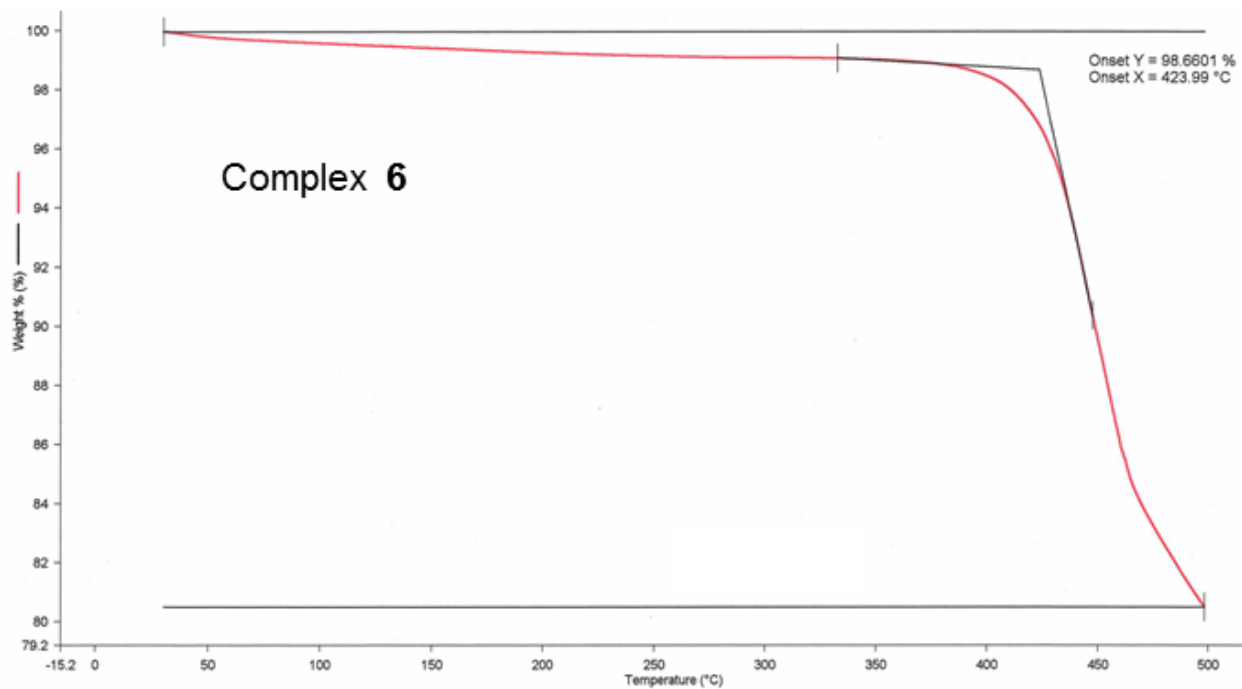

Figure S10. TGA trace of complex 6.

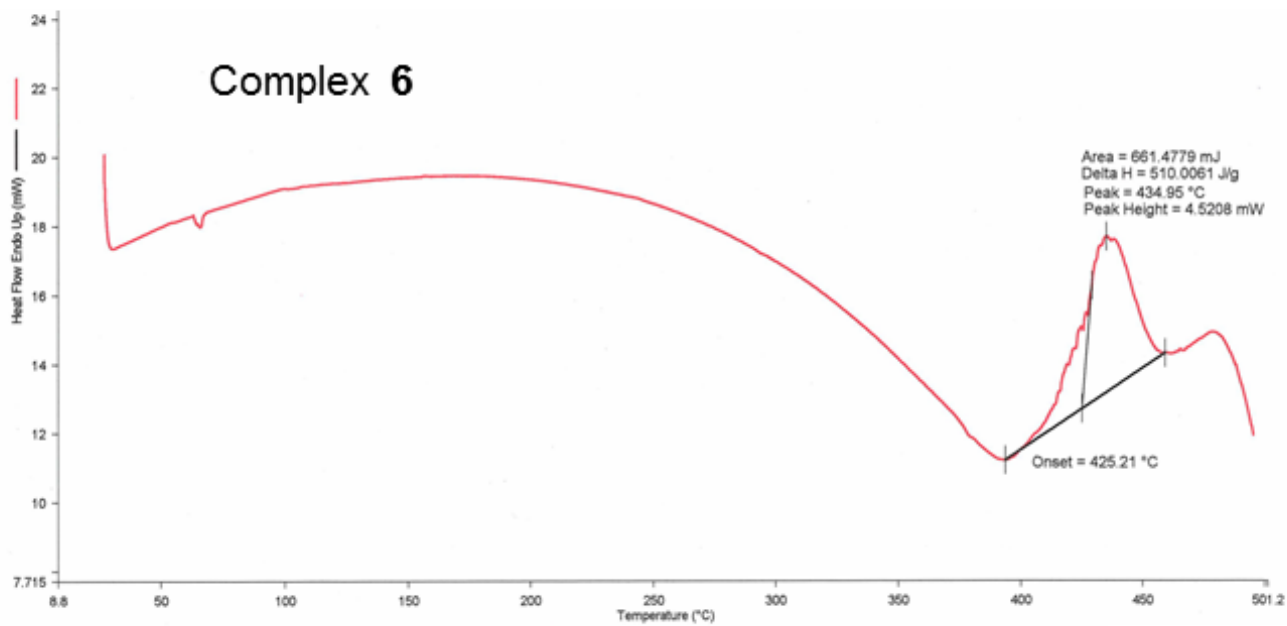

Figure S11. DSC trace of complex 6.

**PhOLED data**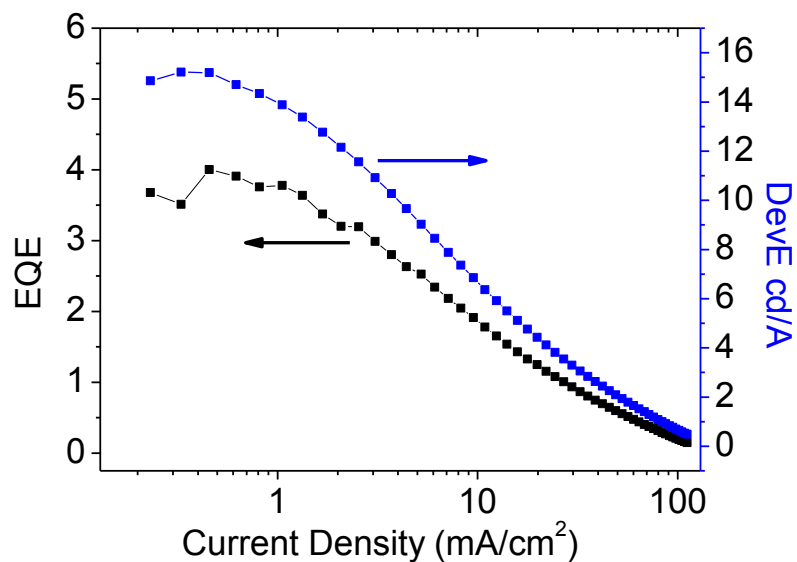

**Figure S13.** PhOLED data for complex **6** in low MWt PVK host with an additional spin-coated layer of TFB. Device structure: ITO/PEDOT:PSS (45 nm)/ TFB (60 nm)/ PVK:OXD-7(40%):Ir complex **6**(5%) (70 nm)/TPBi (30 nm)/LiF/Al.

**NMR Spectra**

Residual CHCl<sub>3</sub> at  
7.25 ppm in CDCl<sub>3</sub>

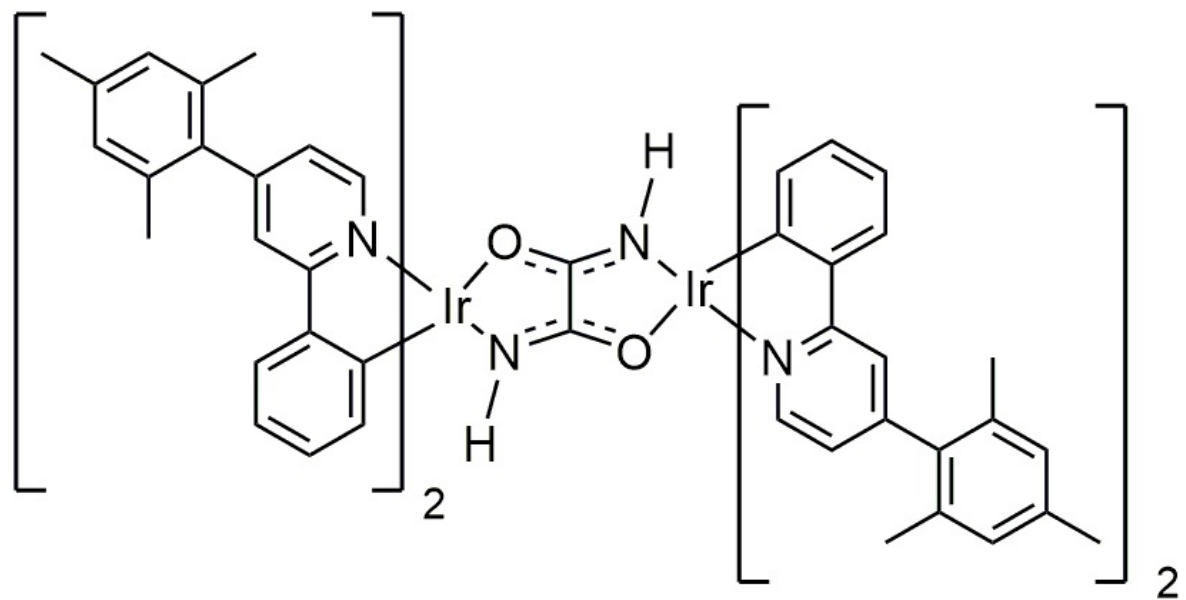

**5**

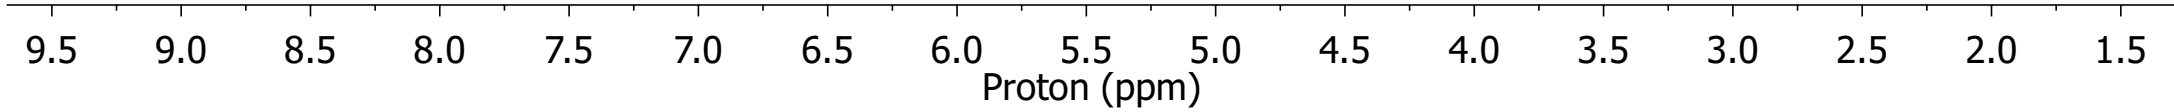



5

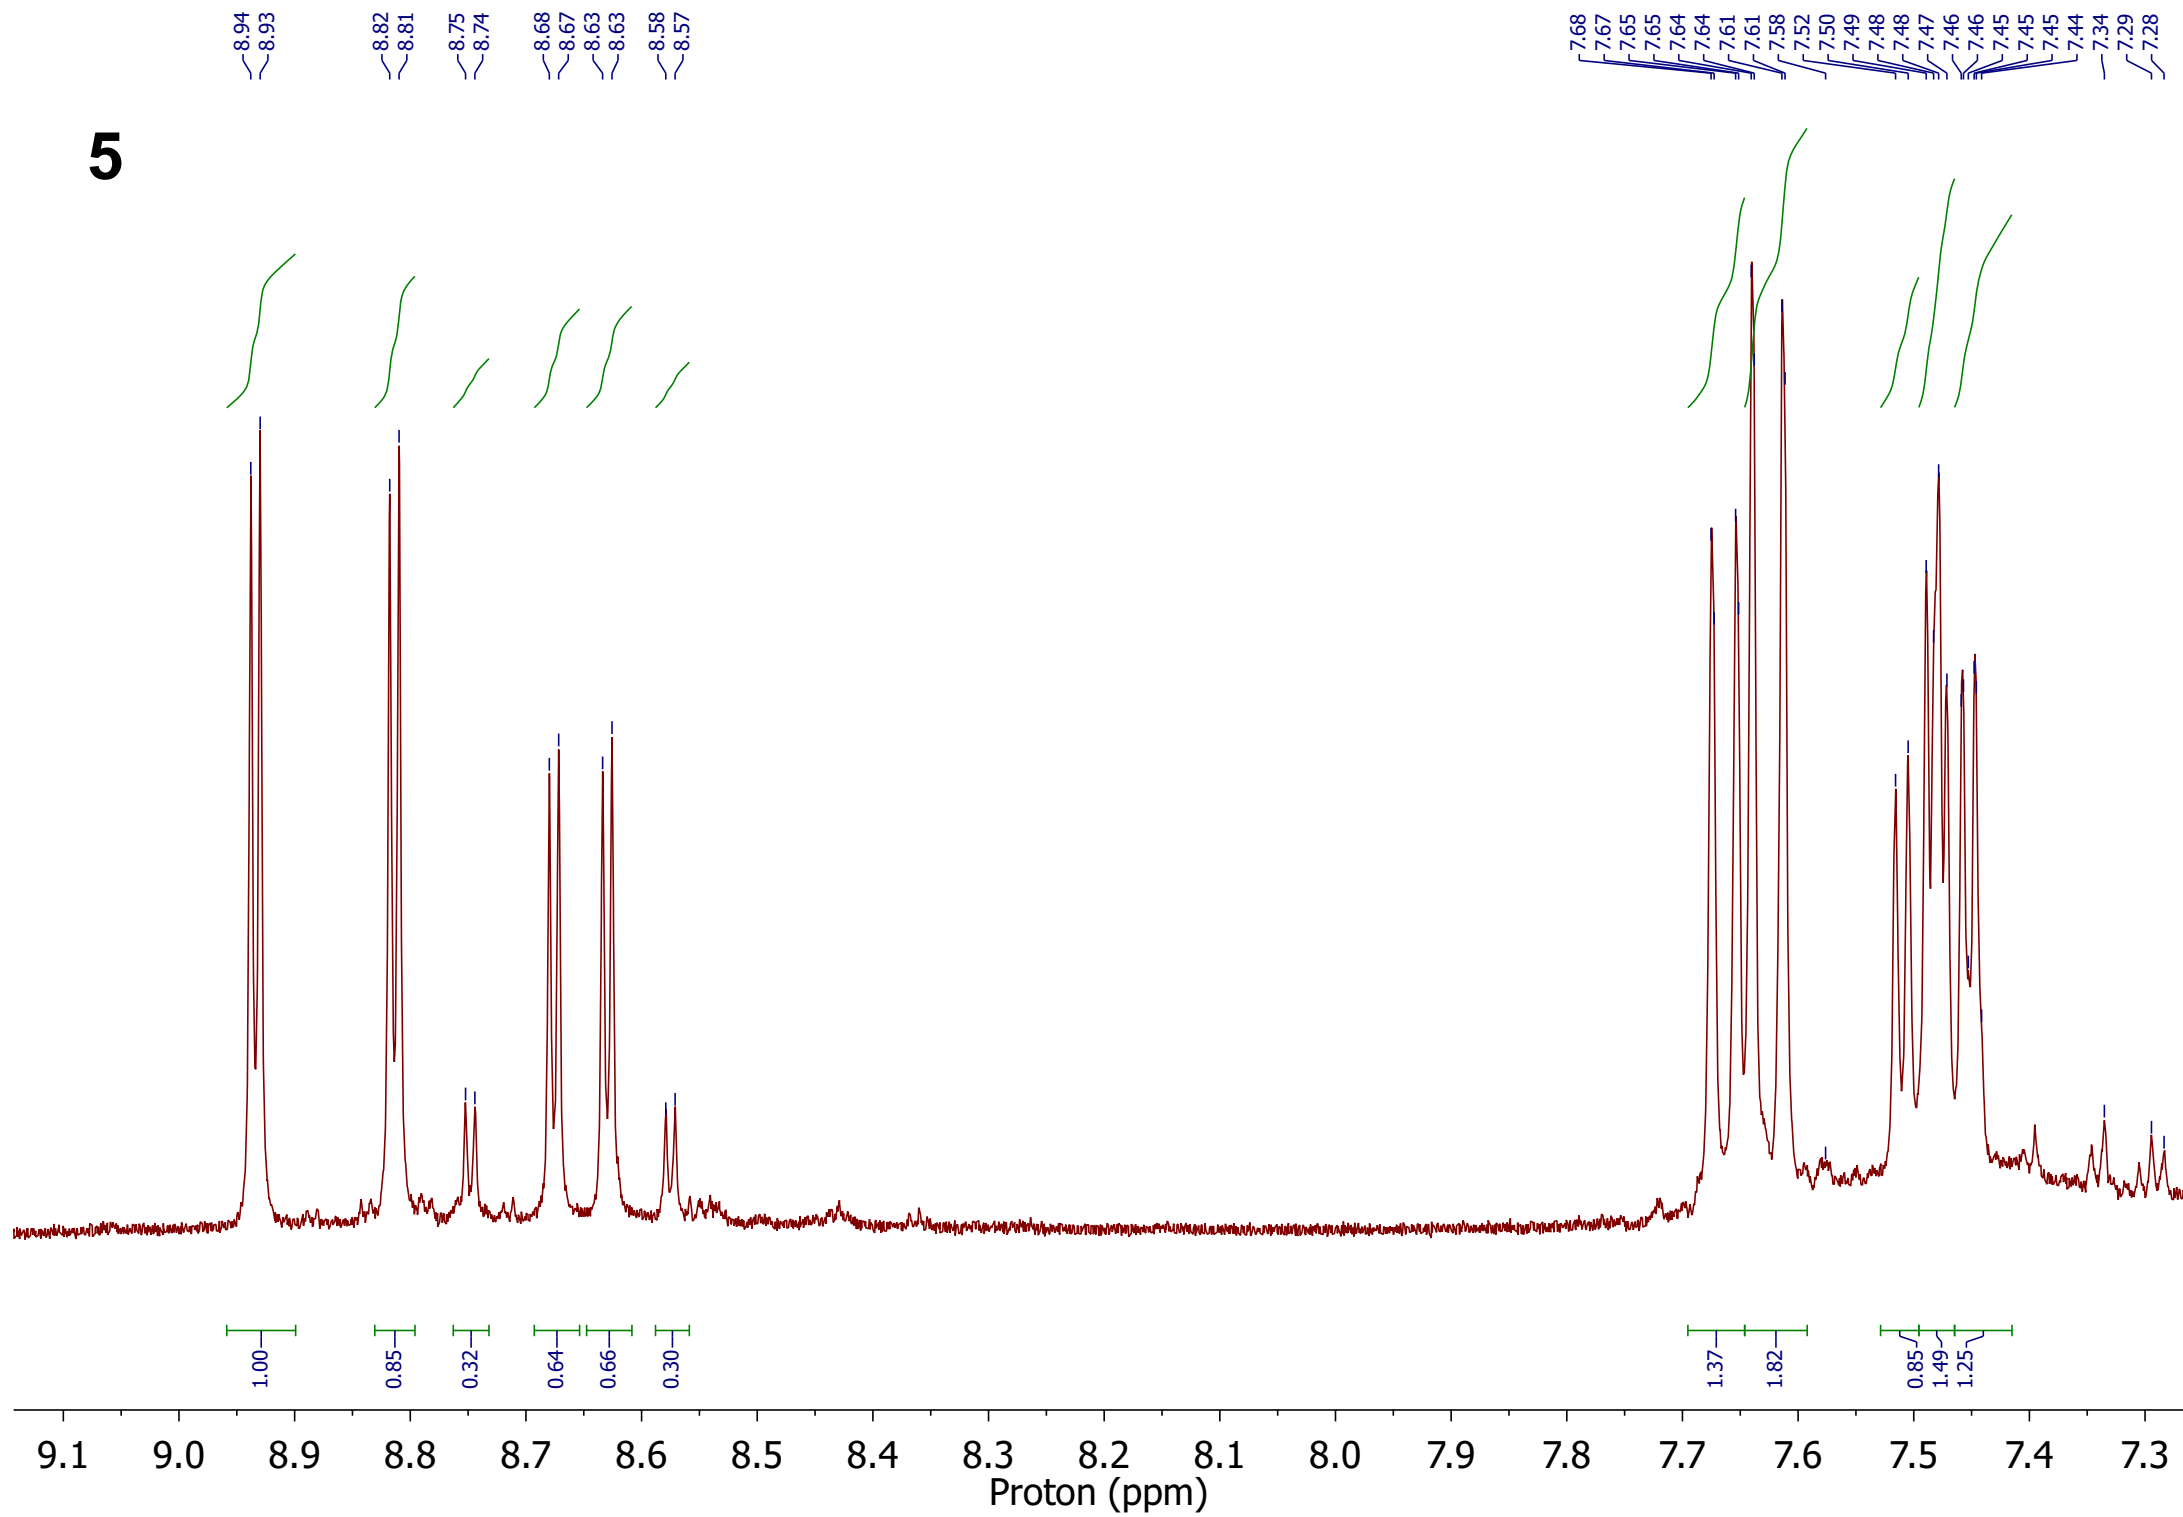

5

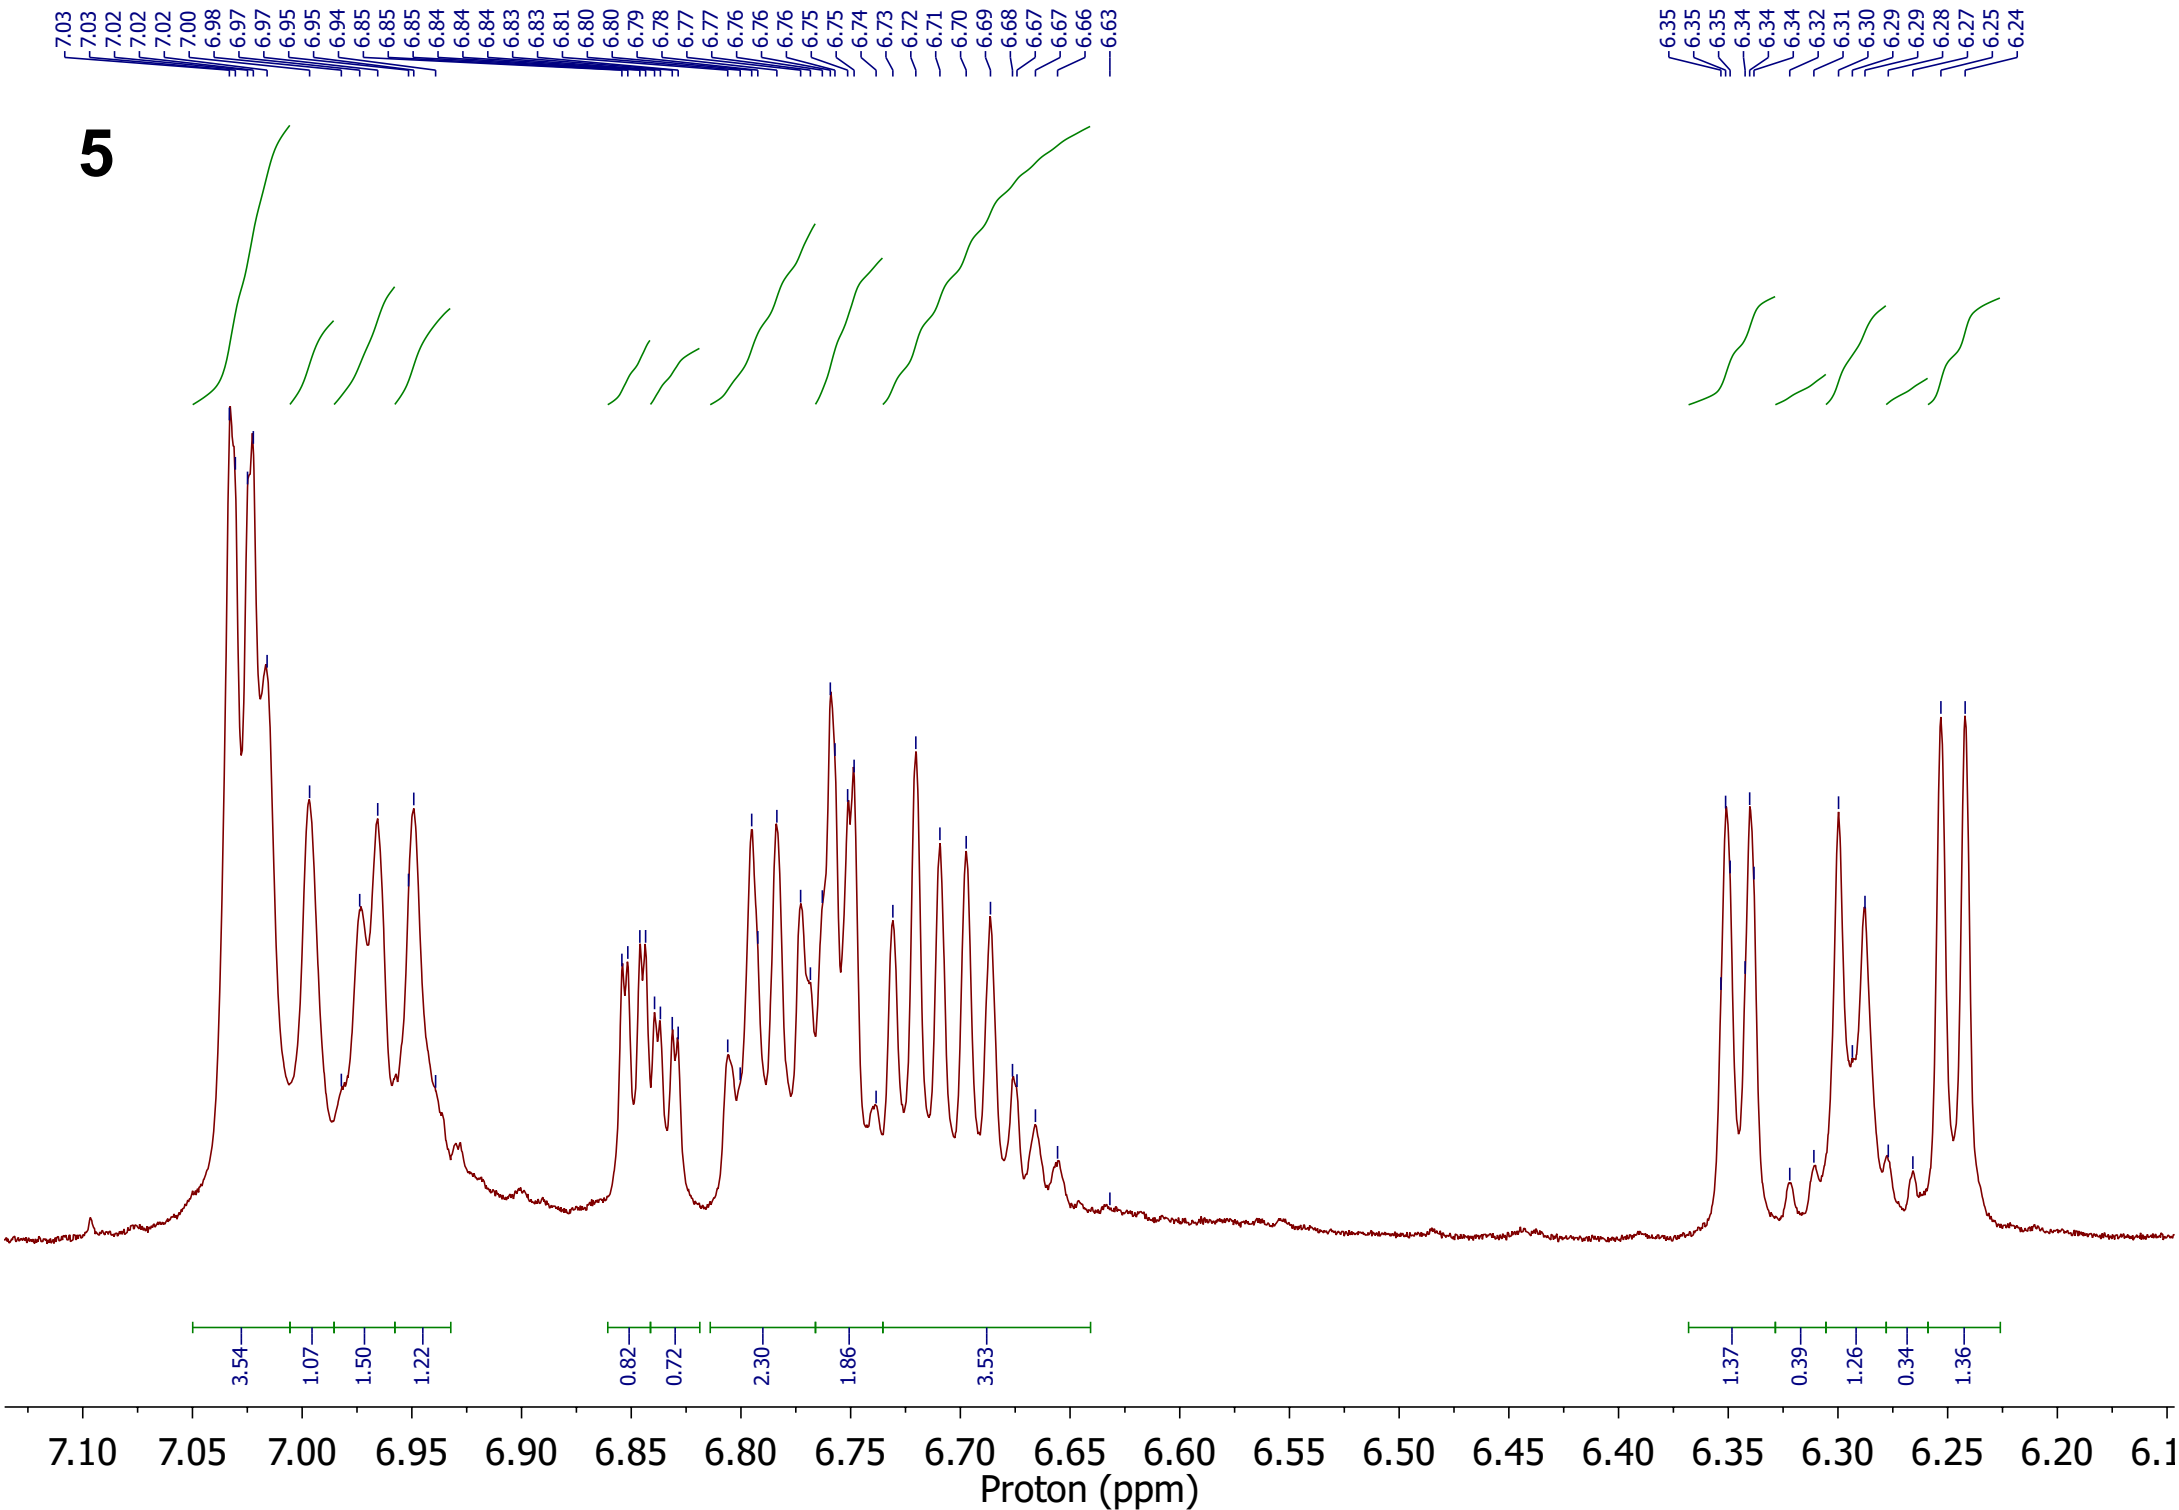

5

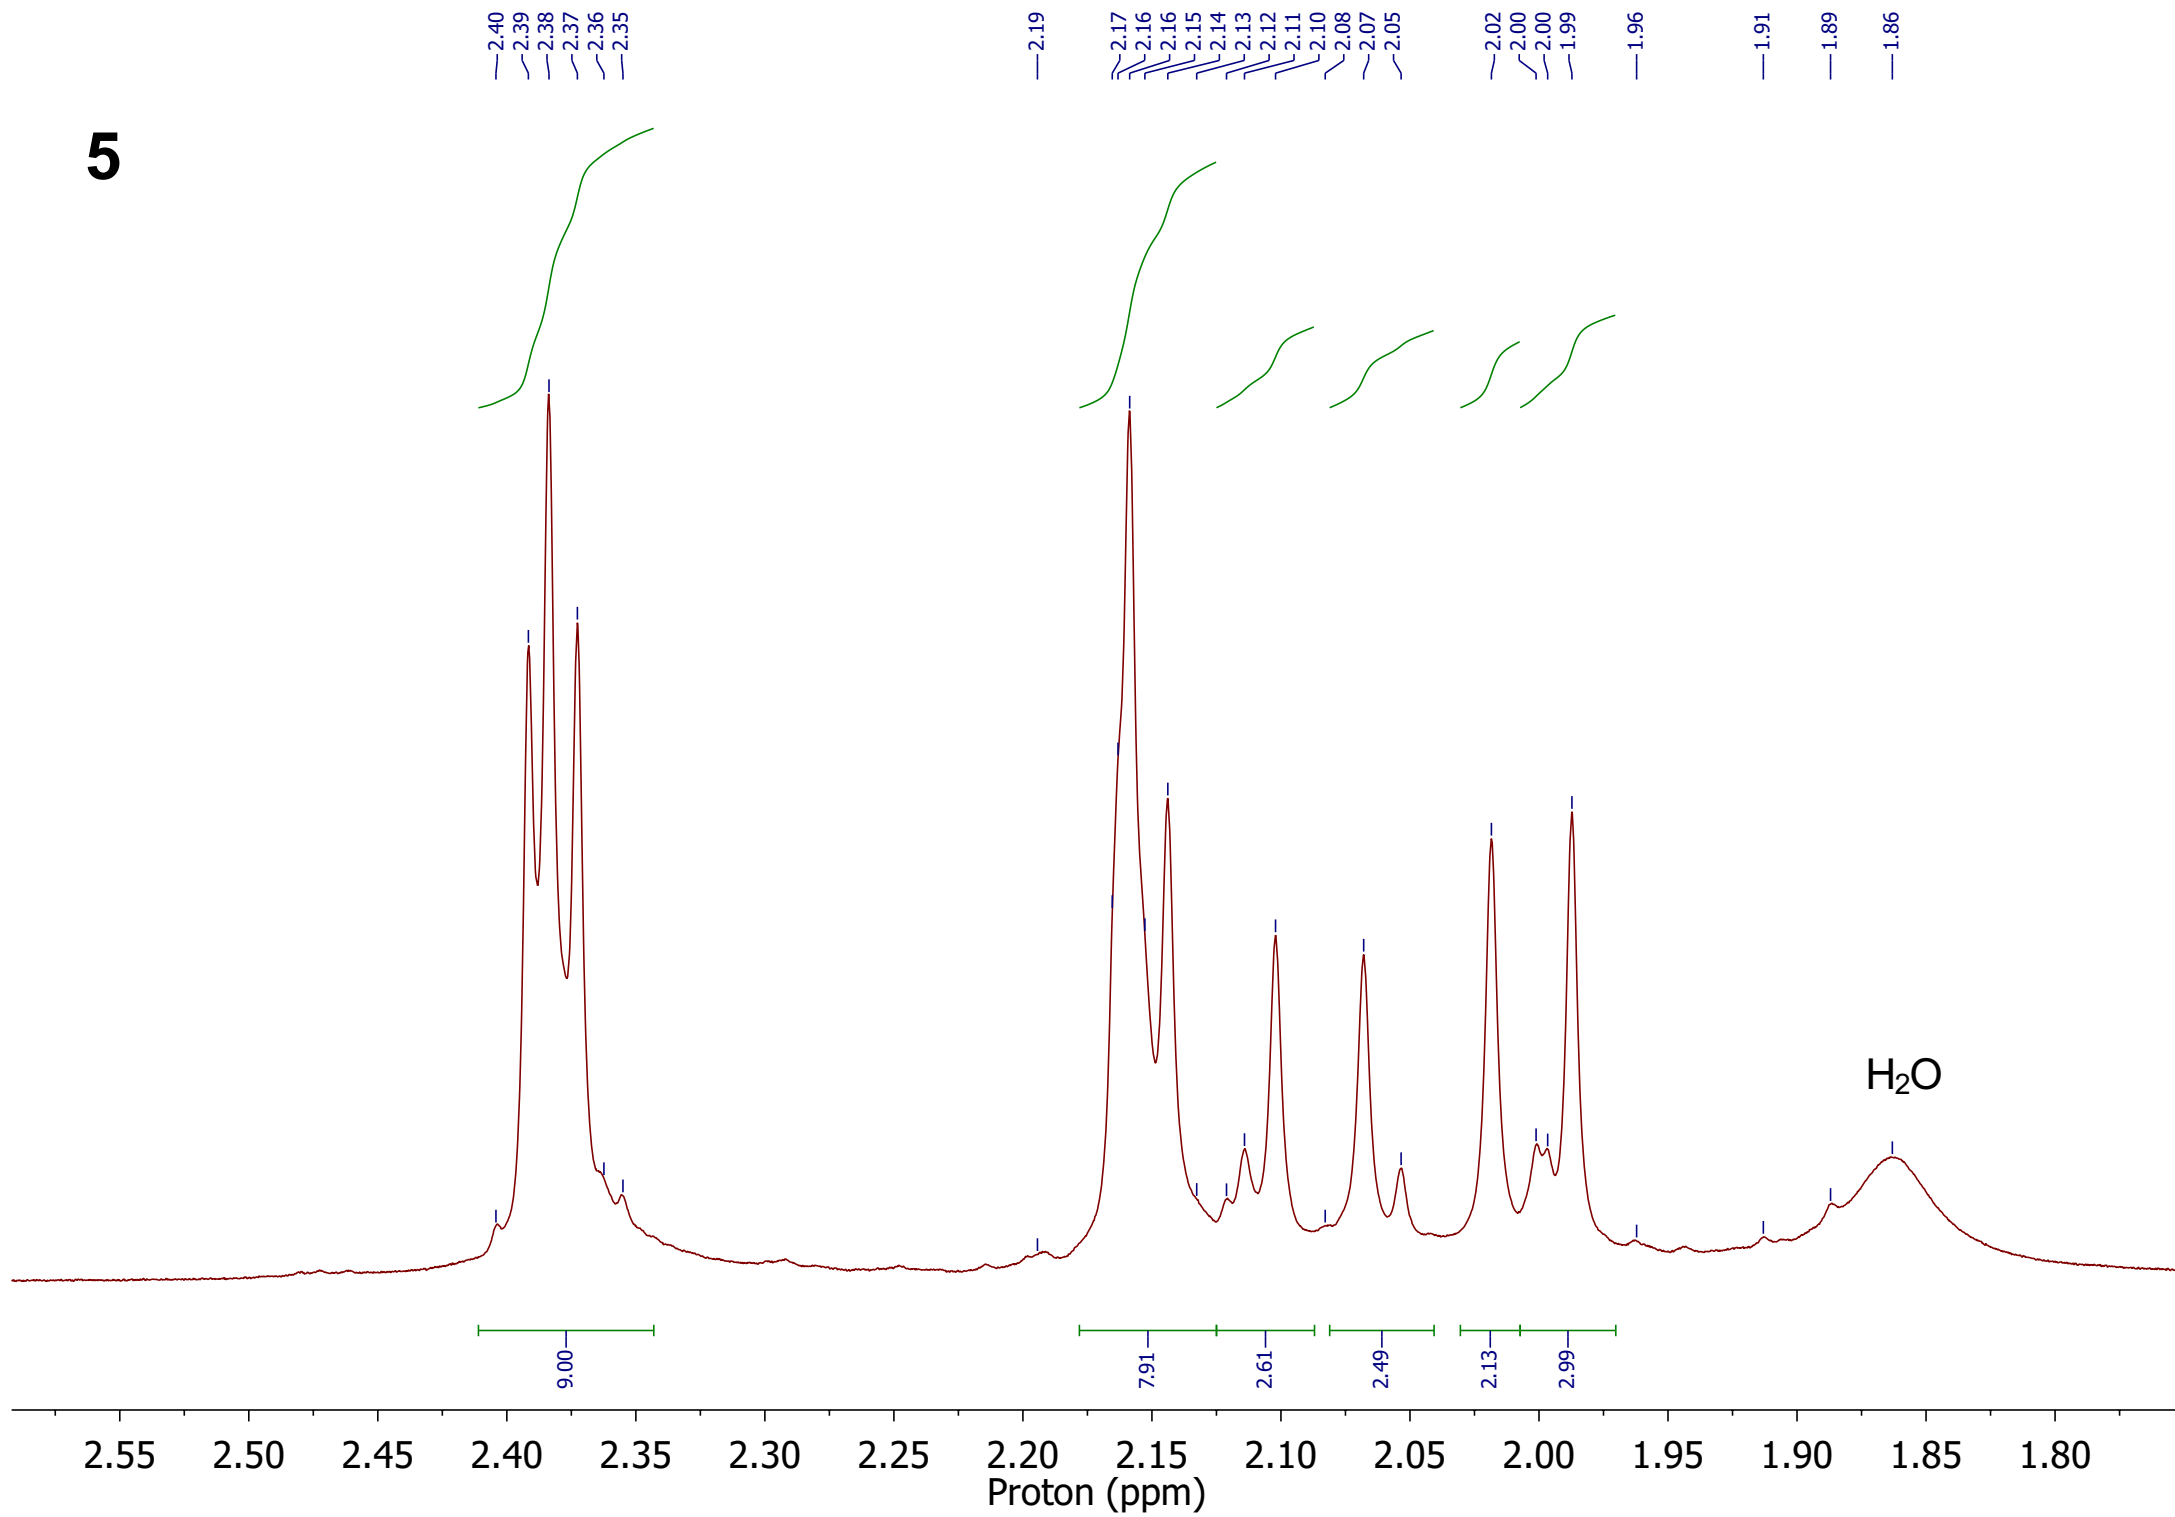

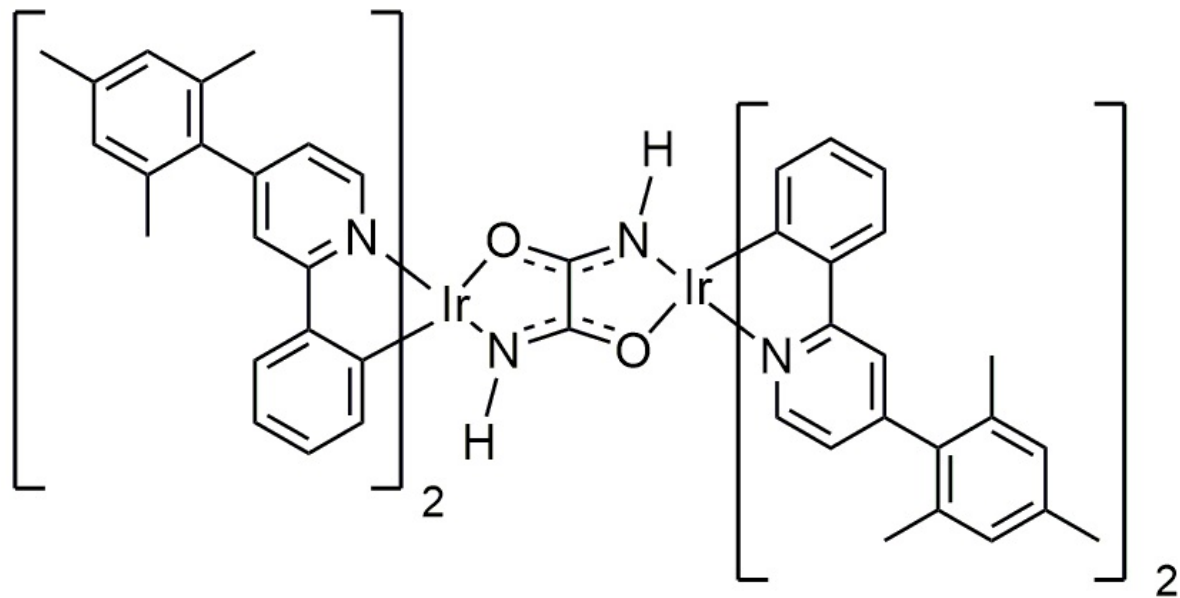

**5**

CDCl<sub>3</sub> at  
77.00 ppm

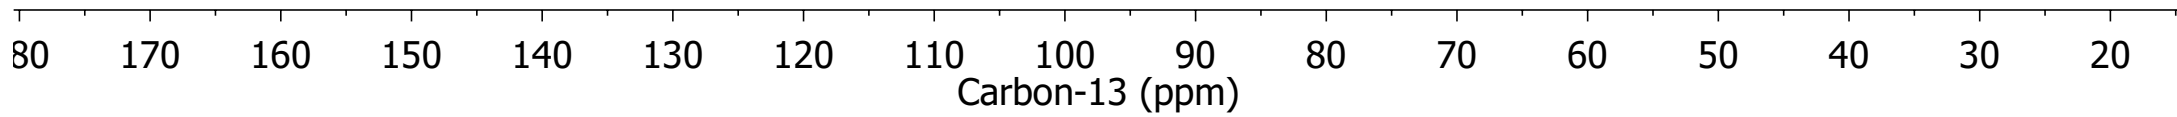

5

174.88  
174.46  
174.35

169.83  
169.23  
169.20  
168.98  
168.91  
168.29

154.78  
154.71

150.58  
150.47  
149.88  
149.72  
149.42  
149.23  
149.02  
147.76  
147.65

144.78  
144.67  
144.35  
144.32  
144.30  
144.25  
143.88

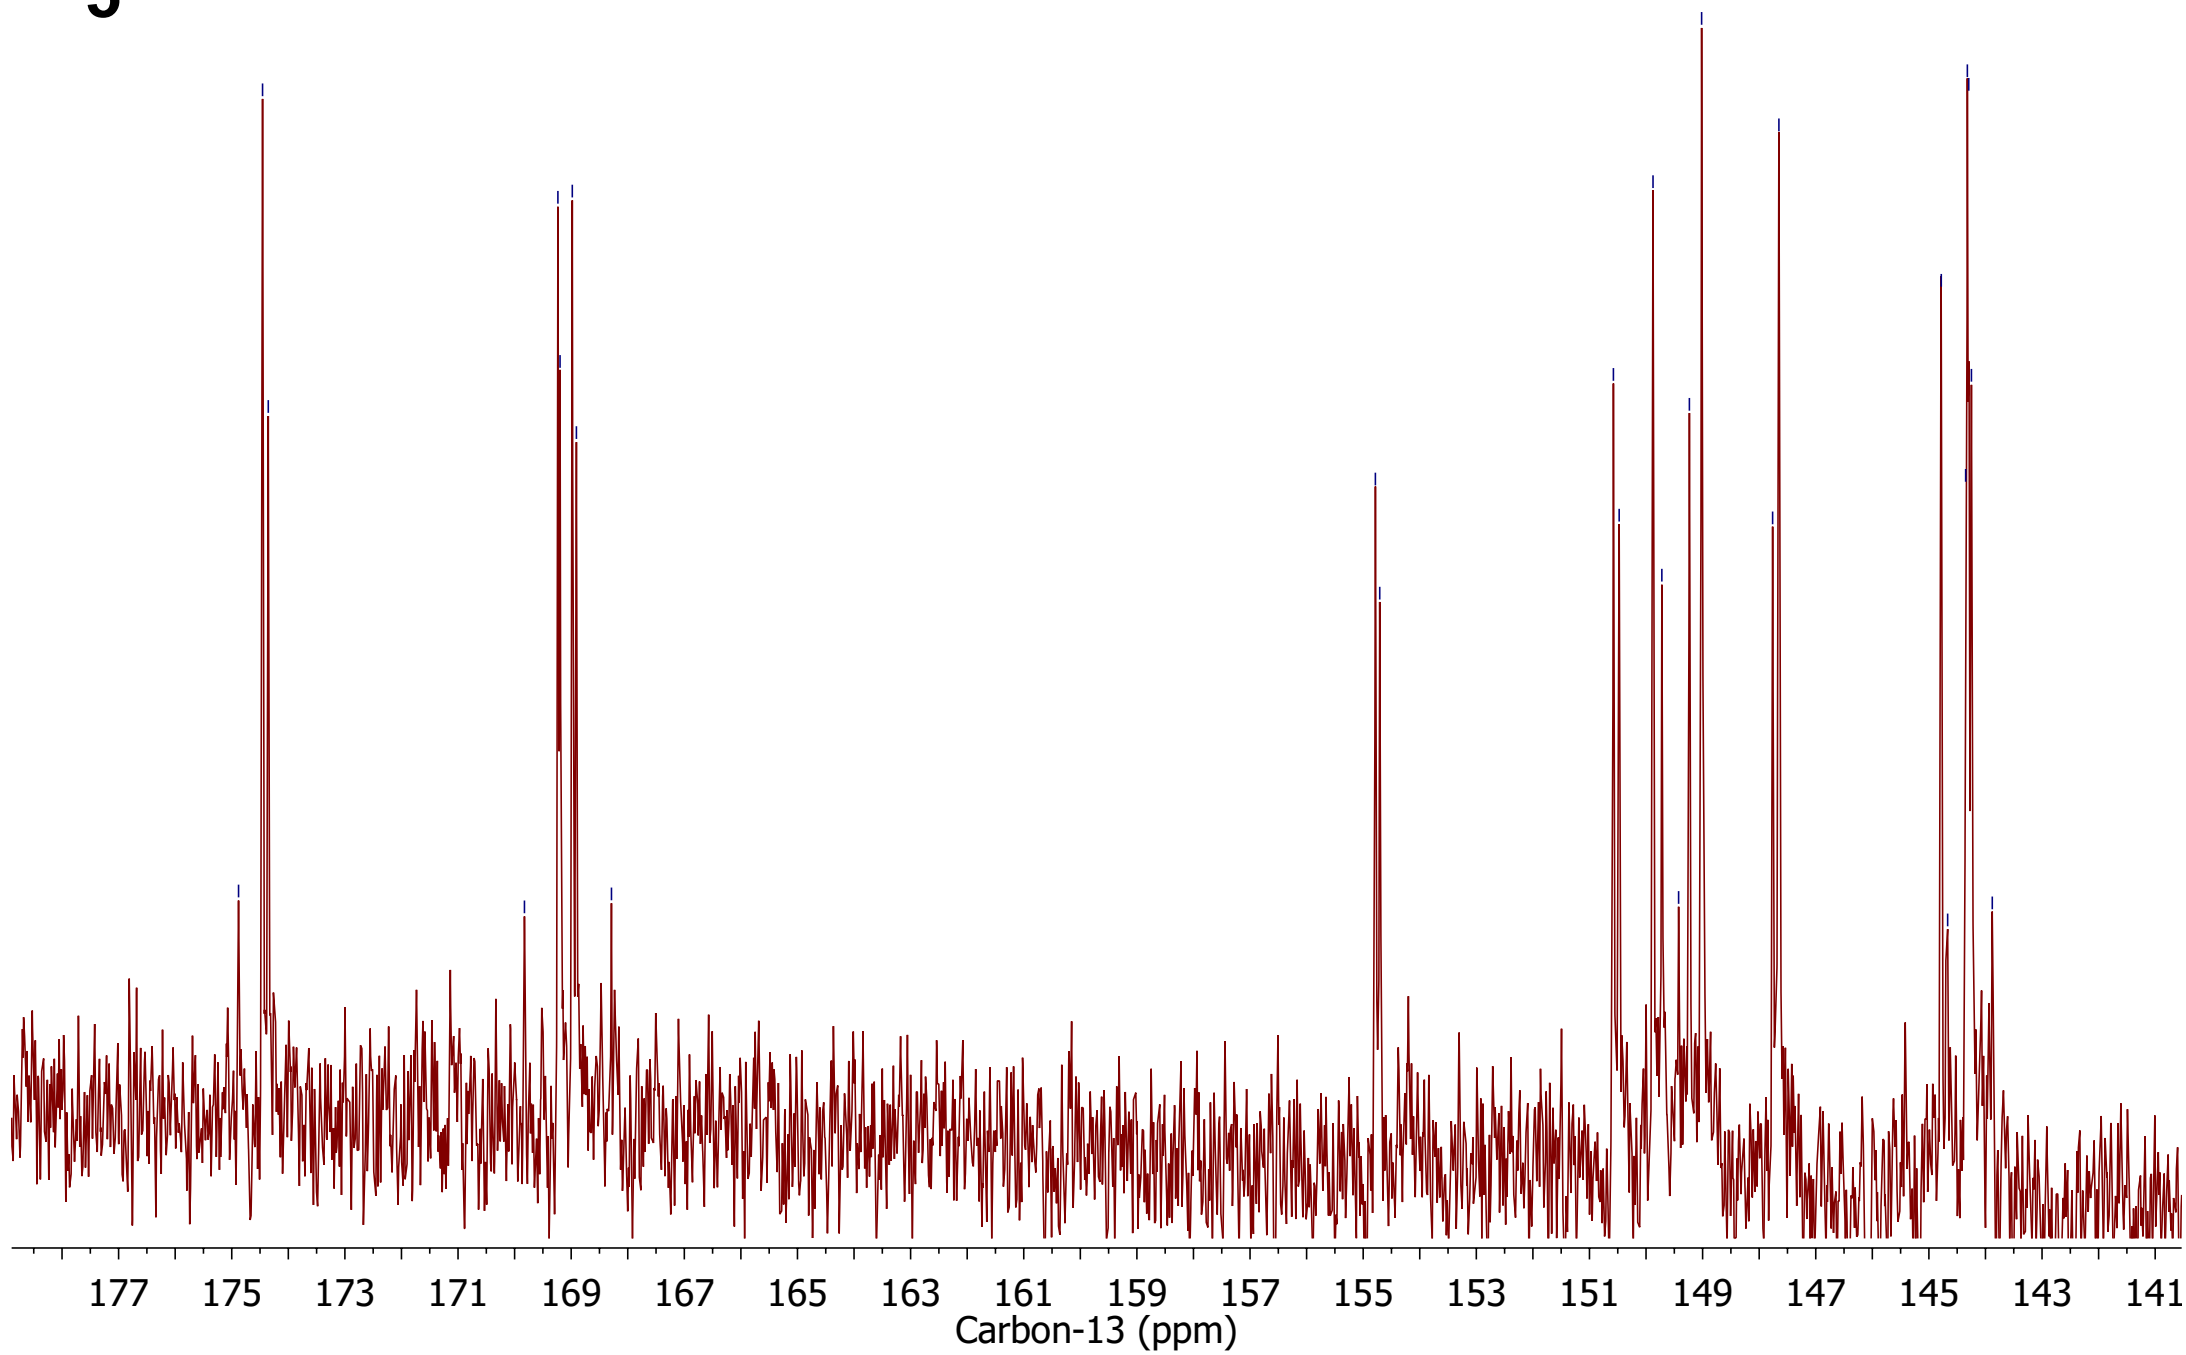

5

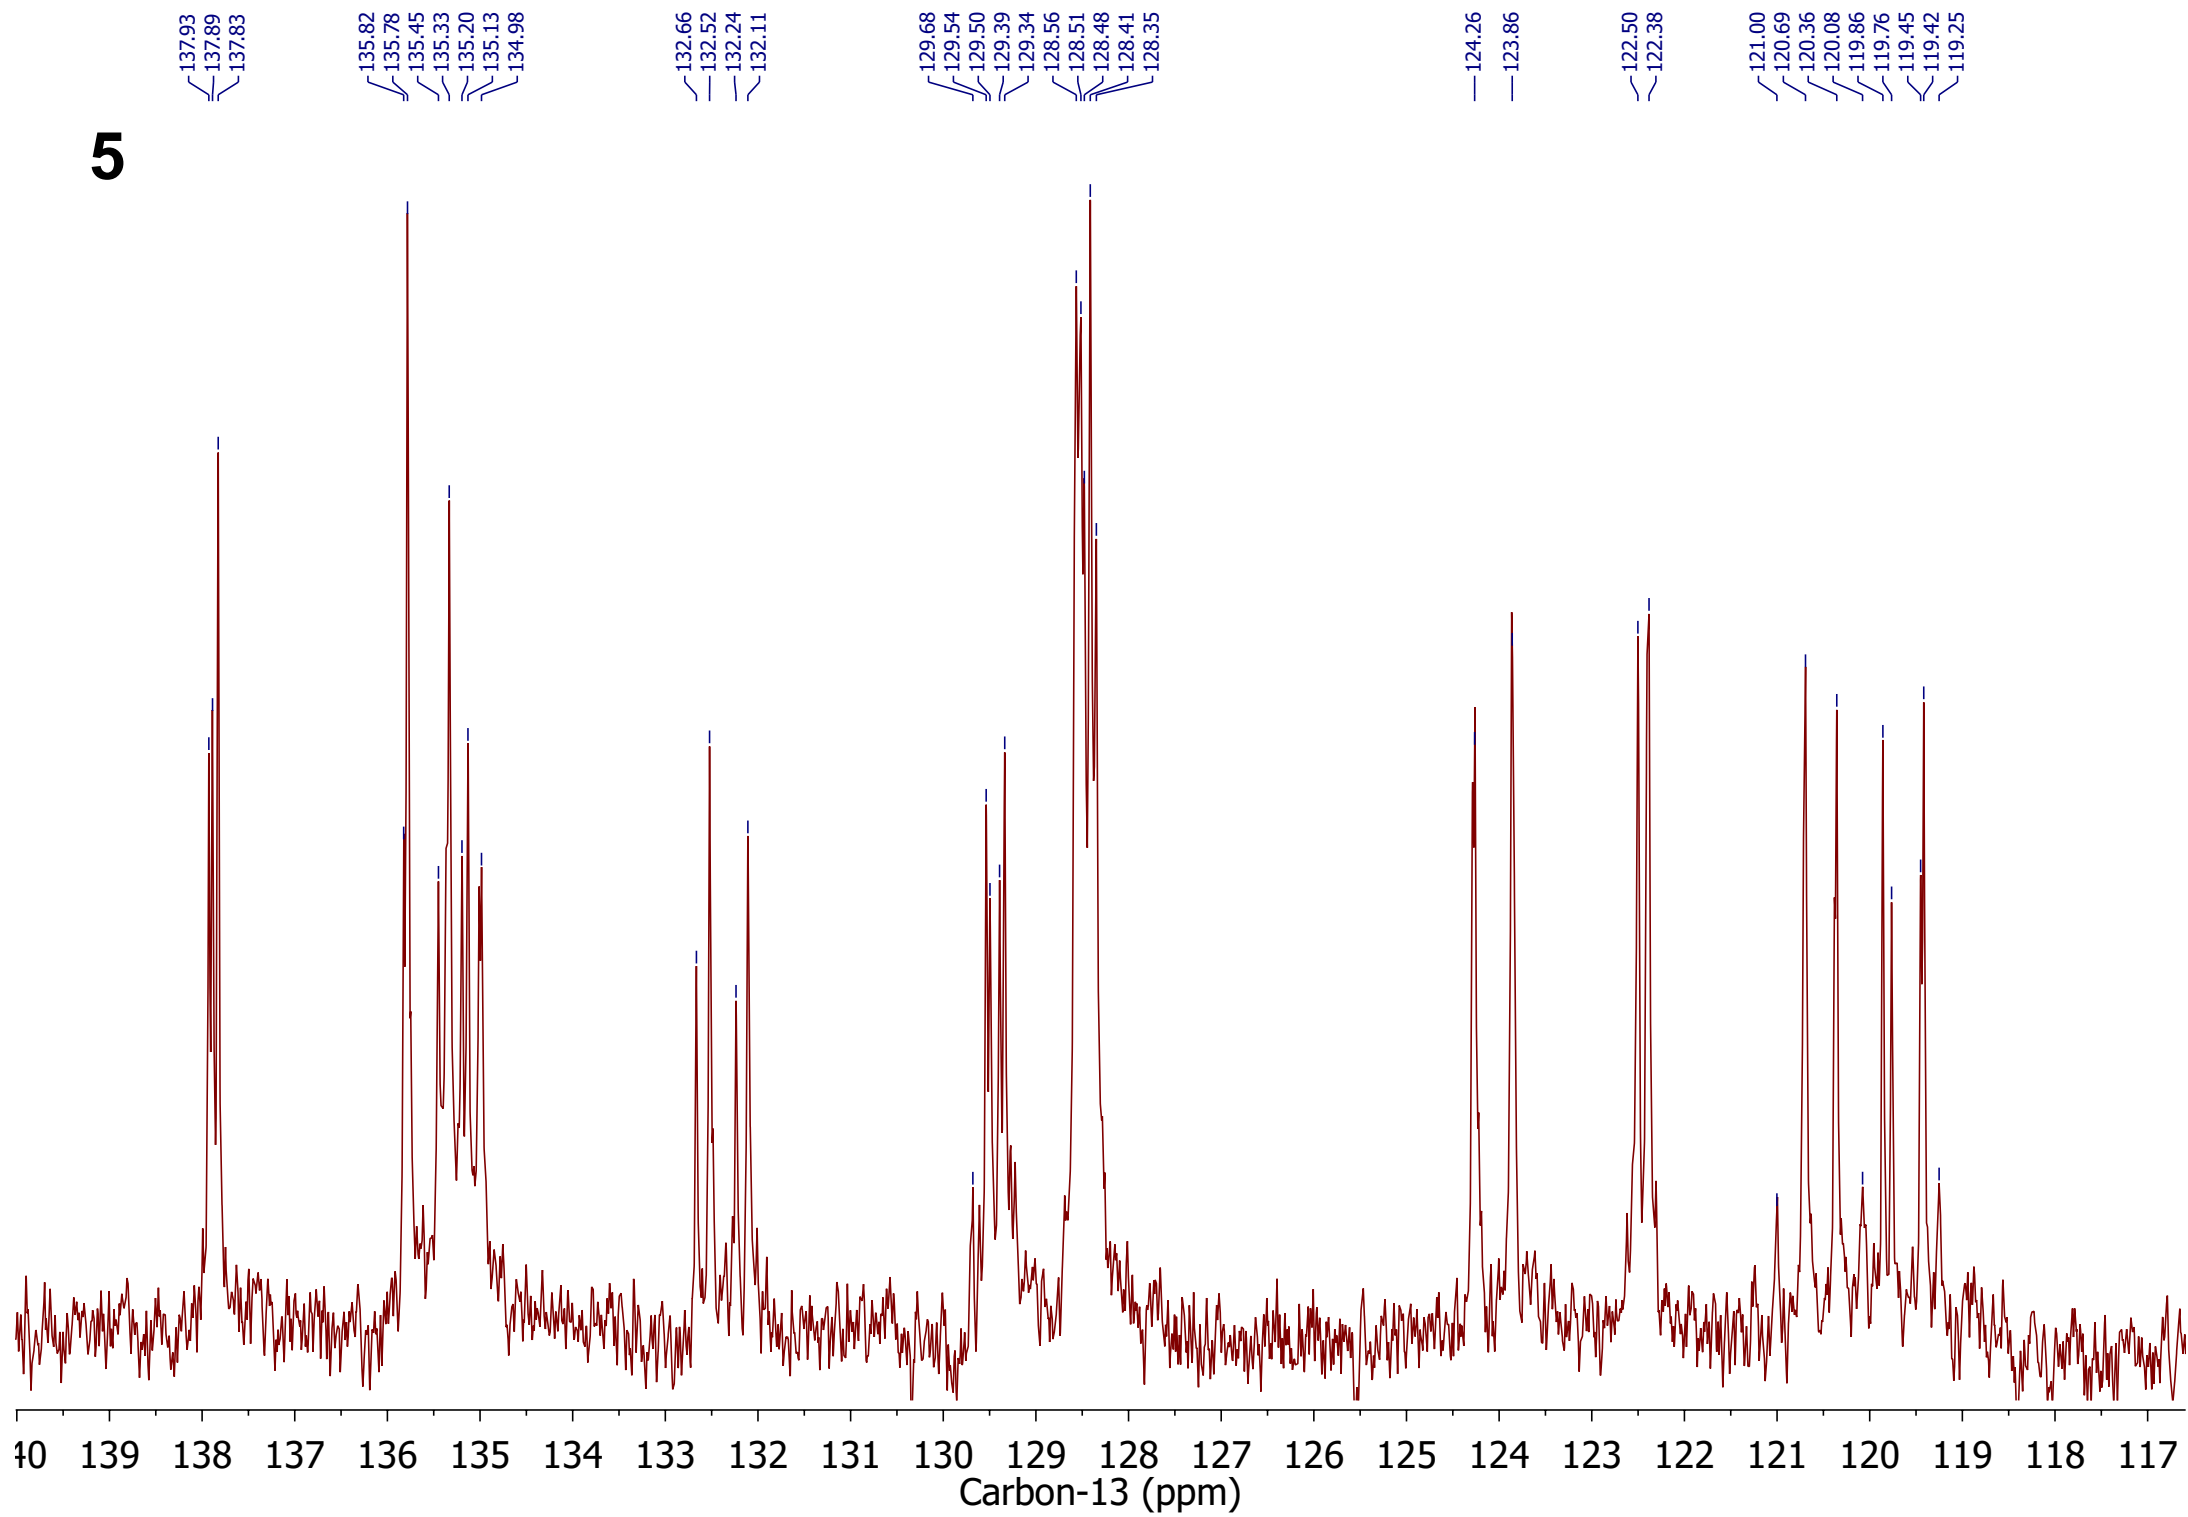

5

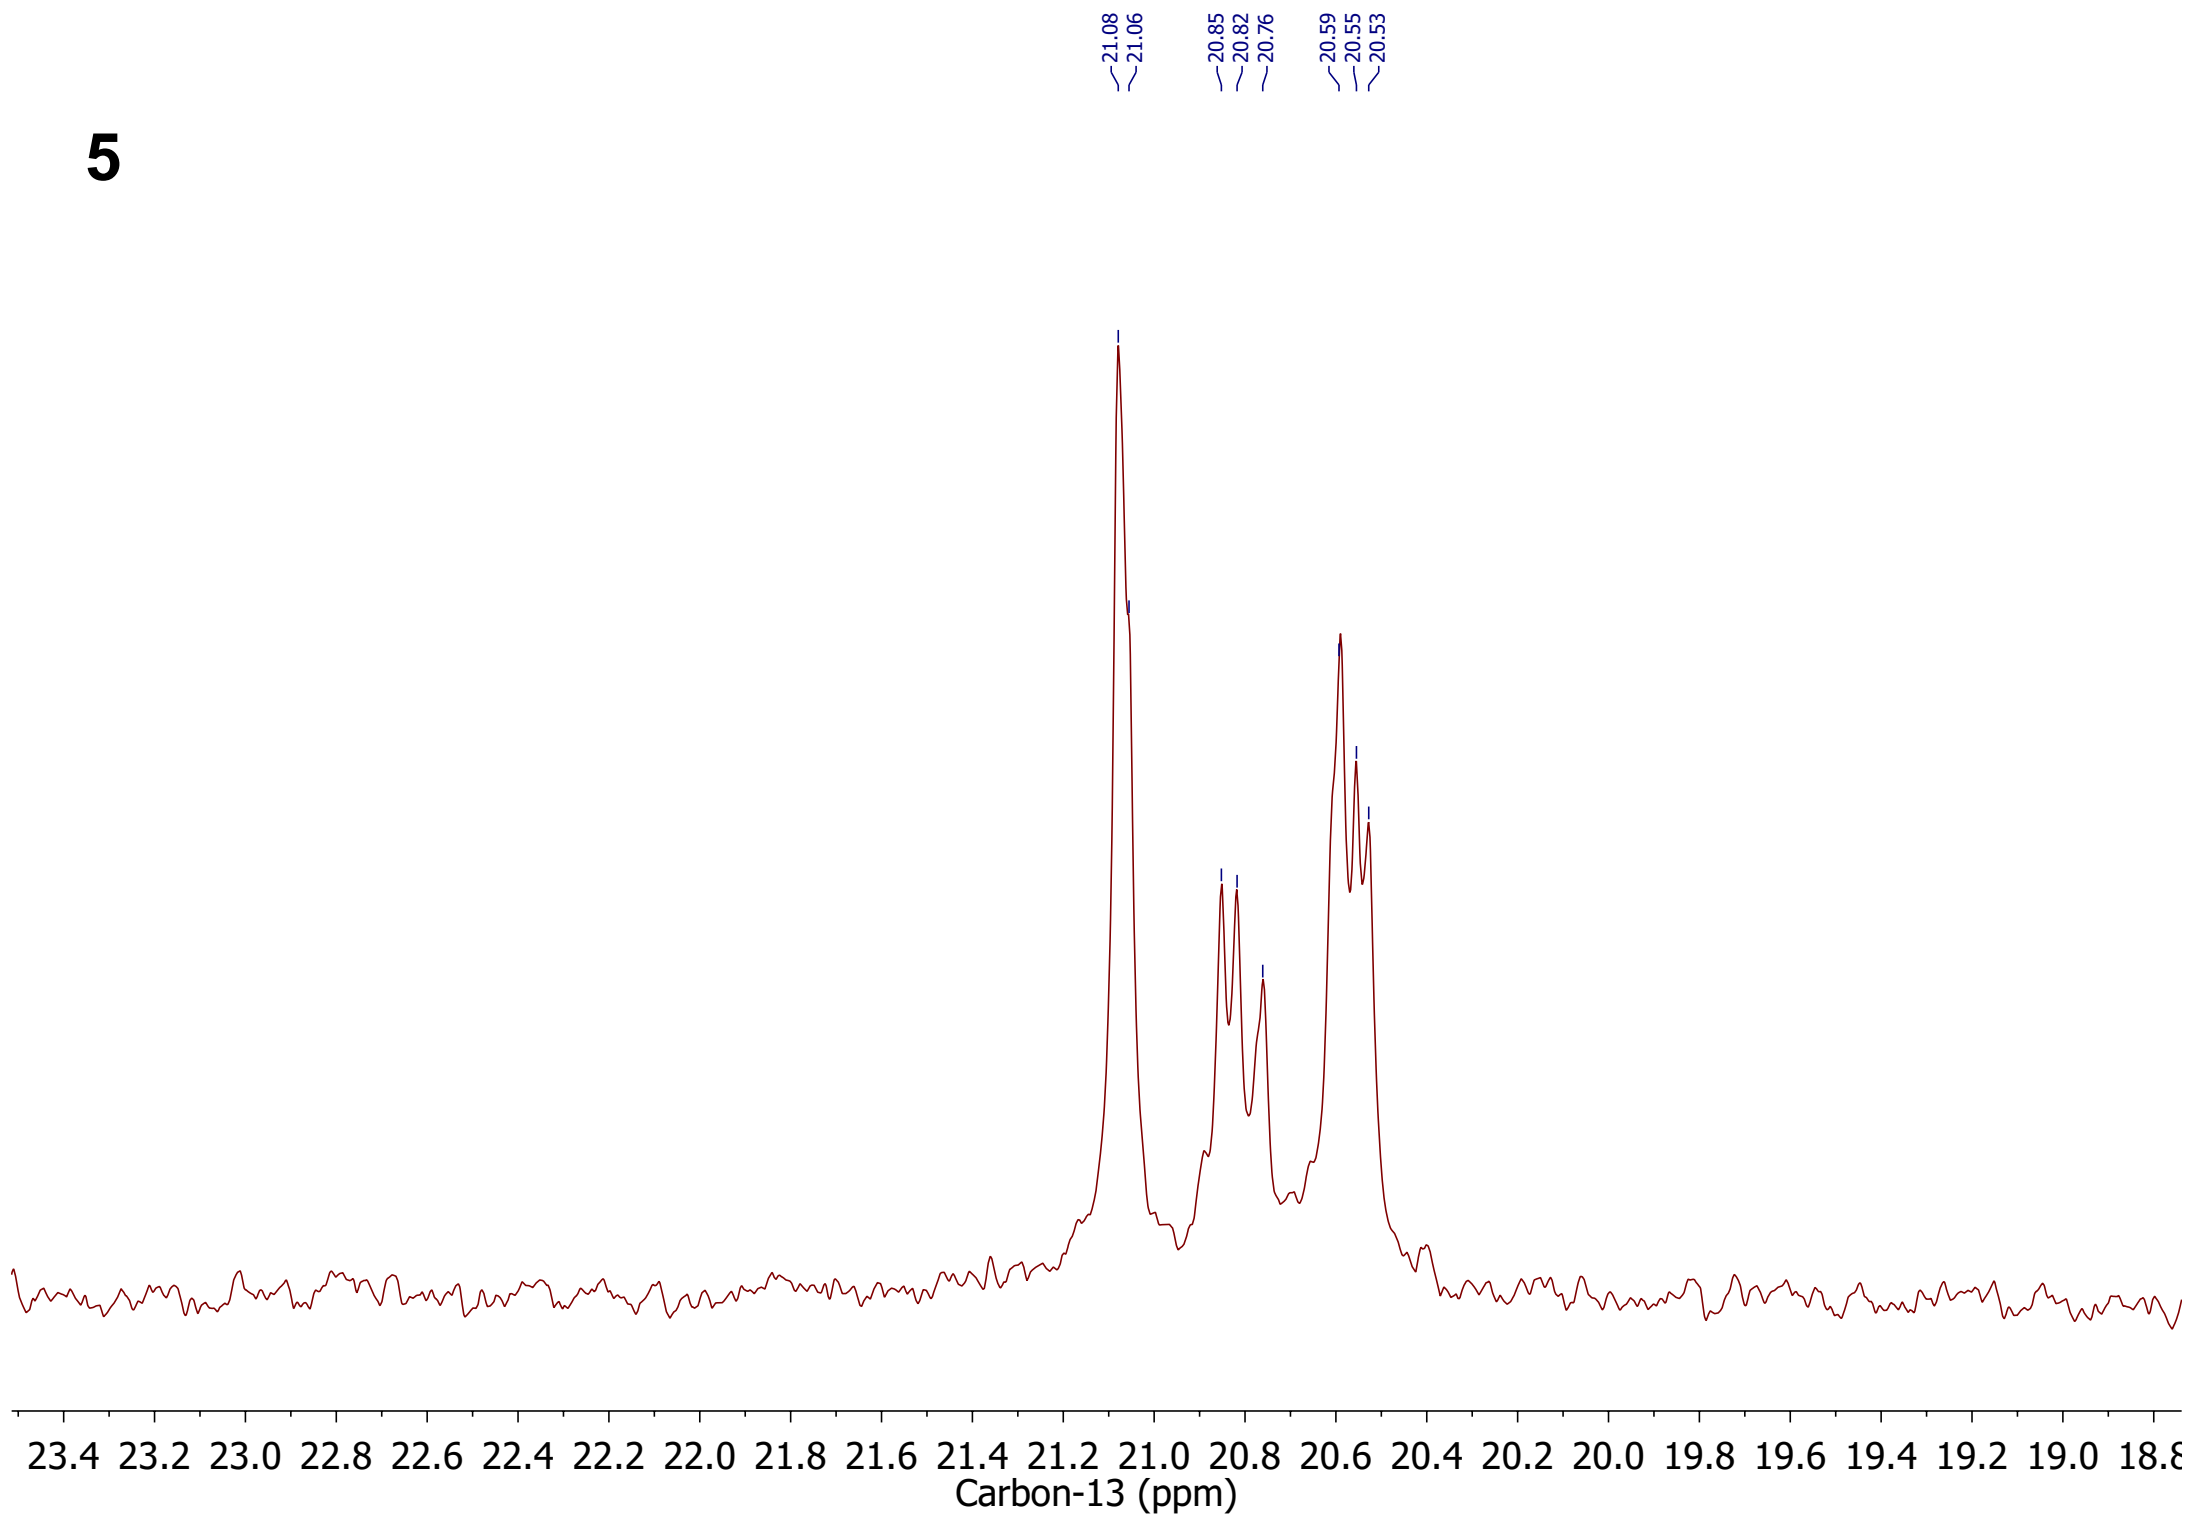

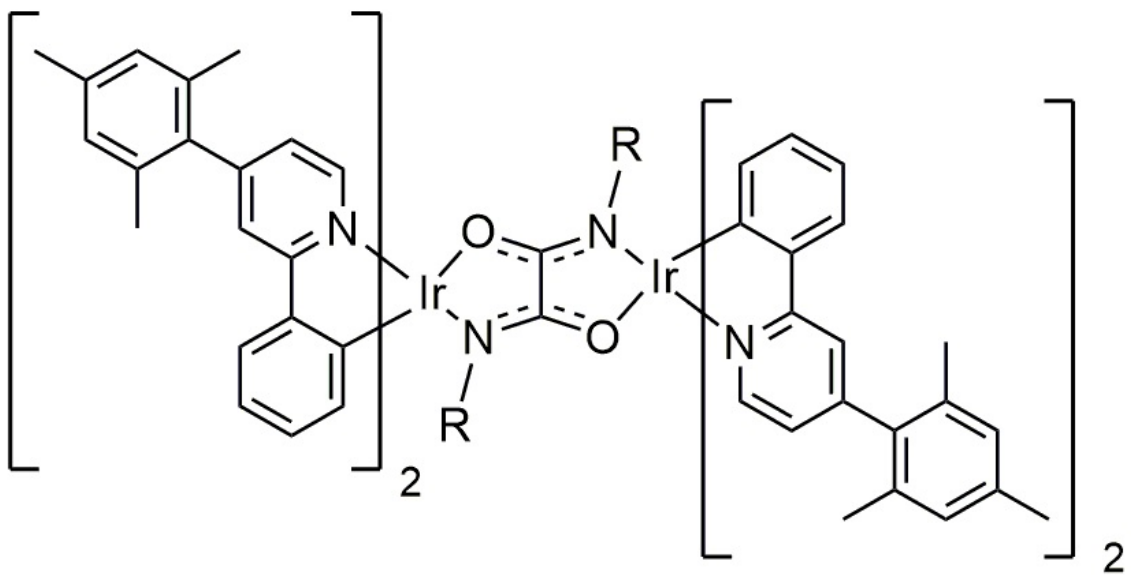

**6** R = 4-*t*Bu-C<sub>6</sub>H<sub>4</sub>

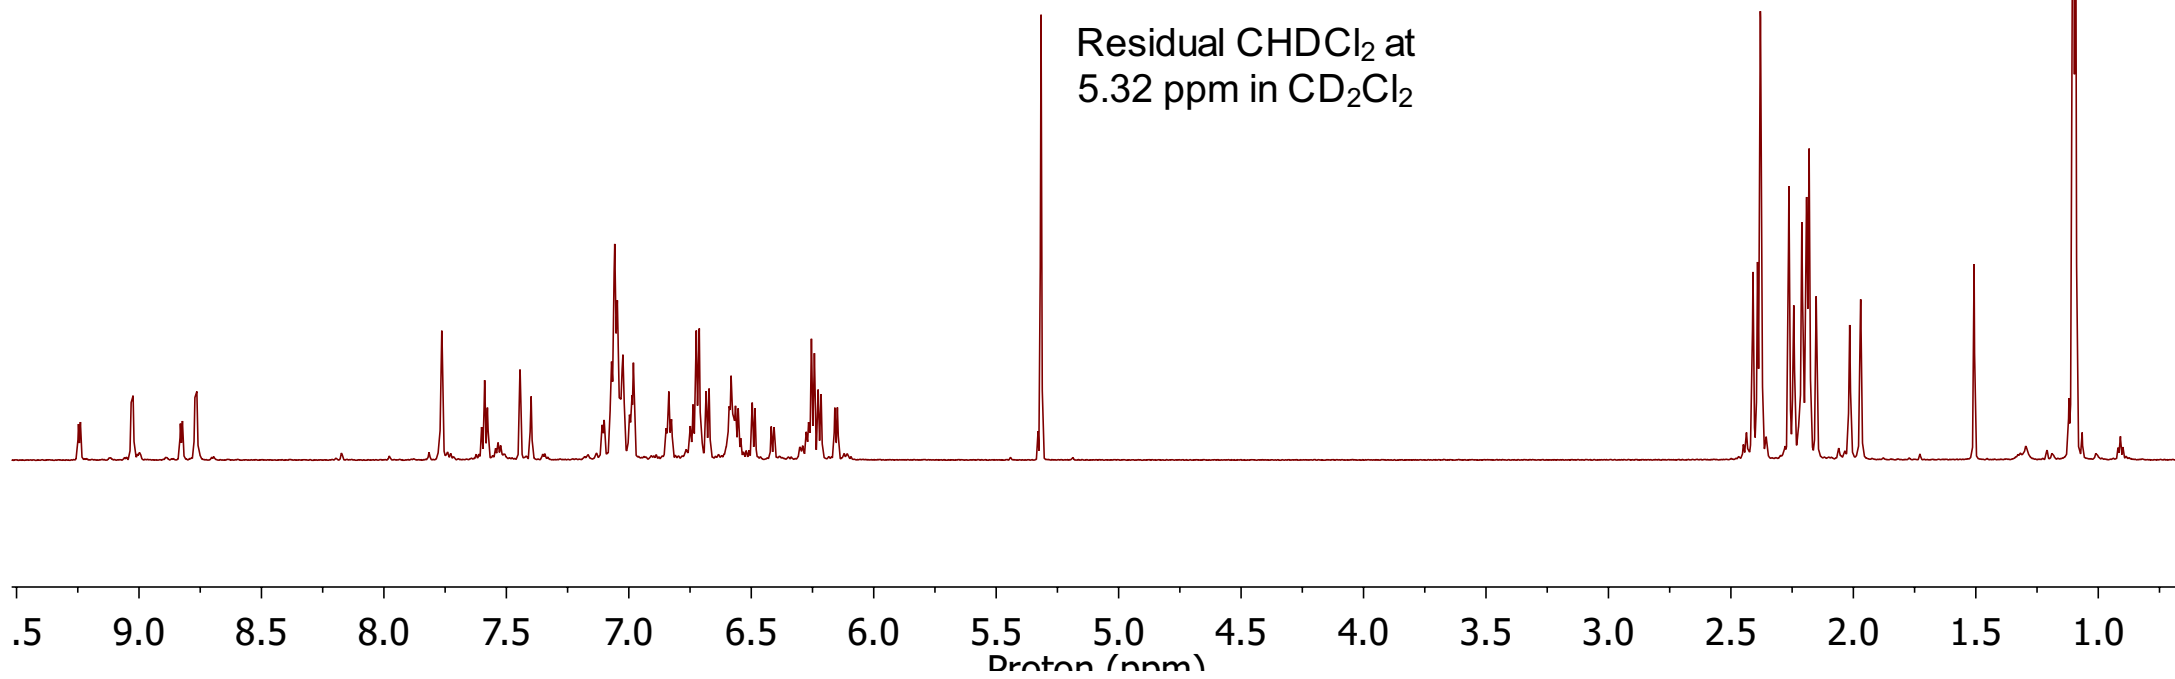



6

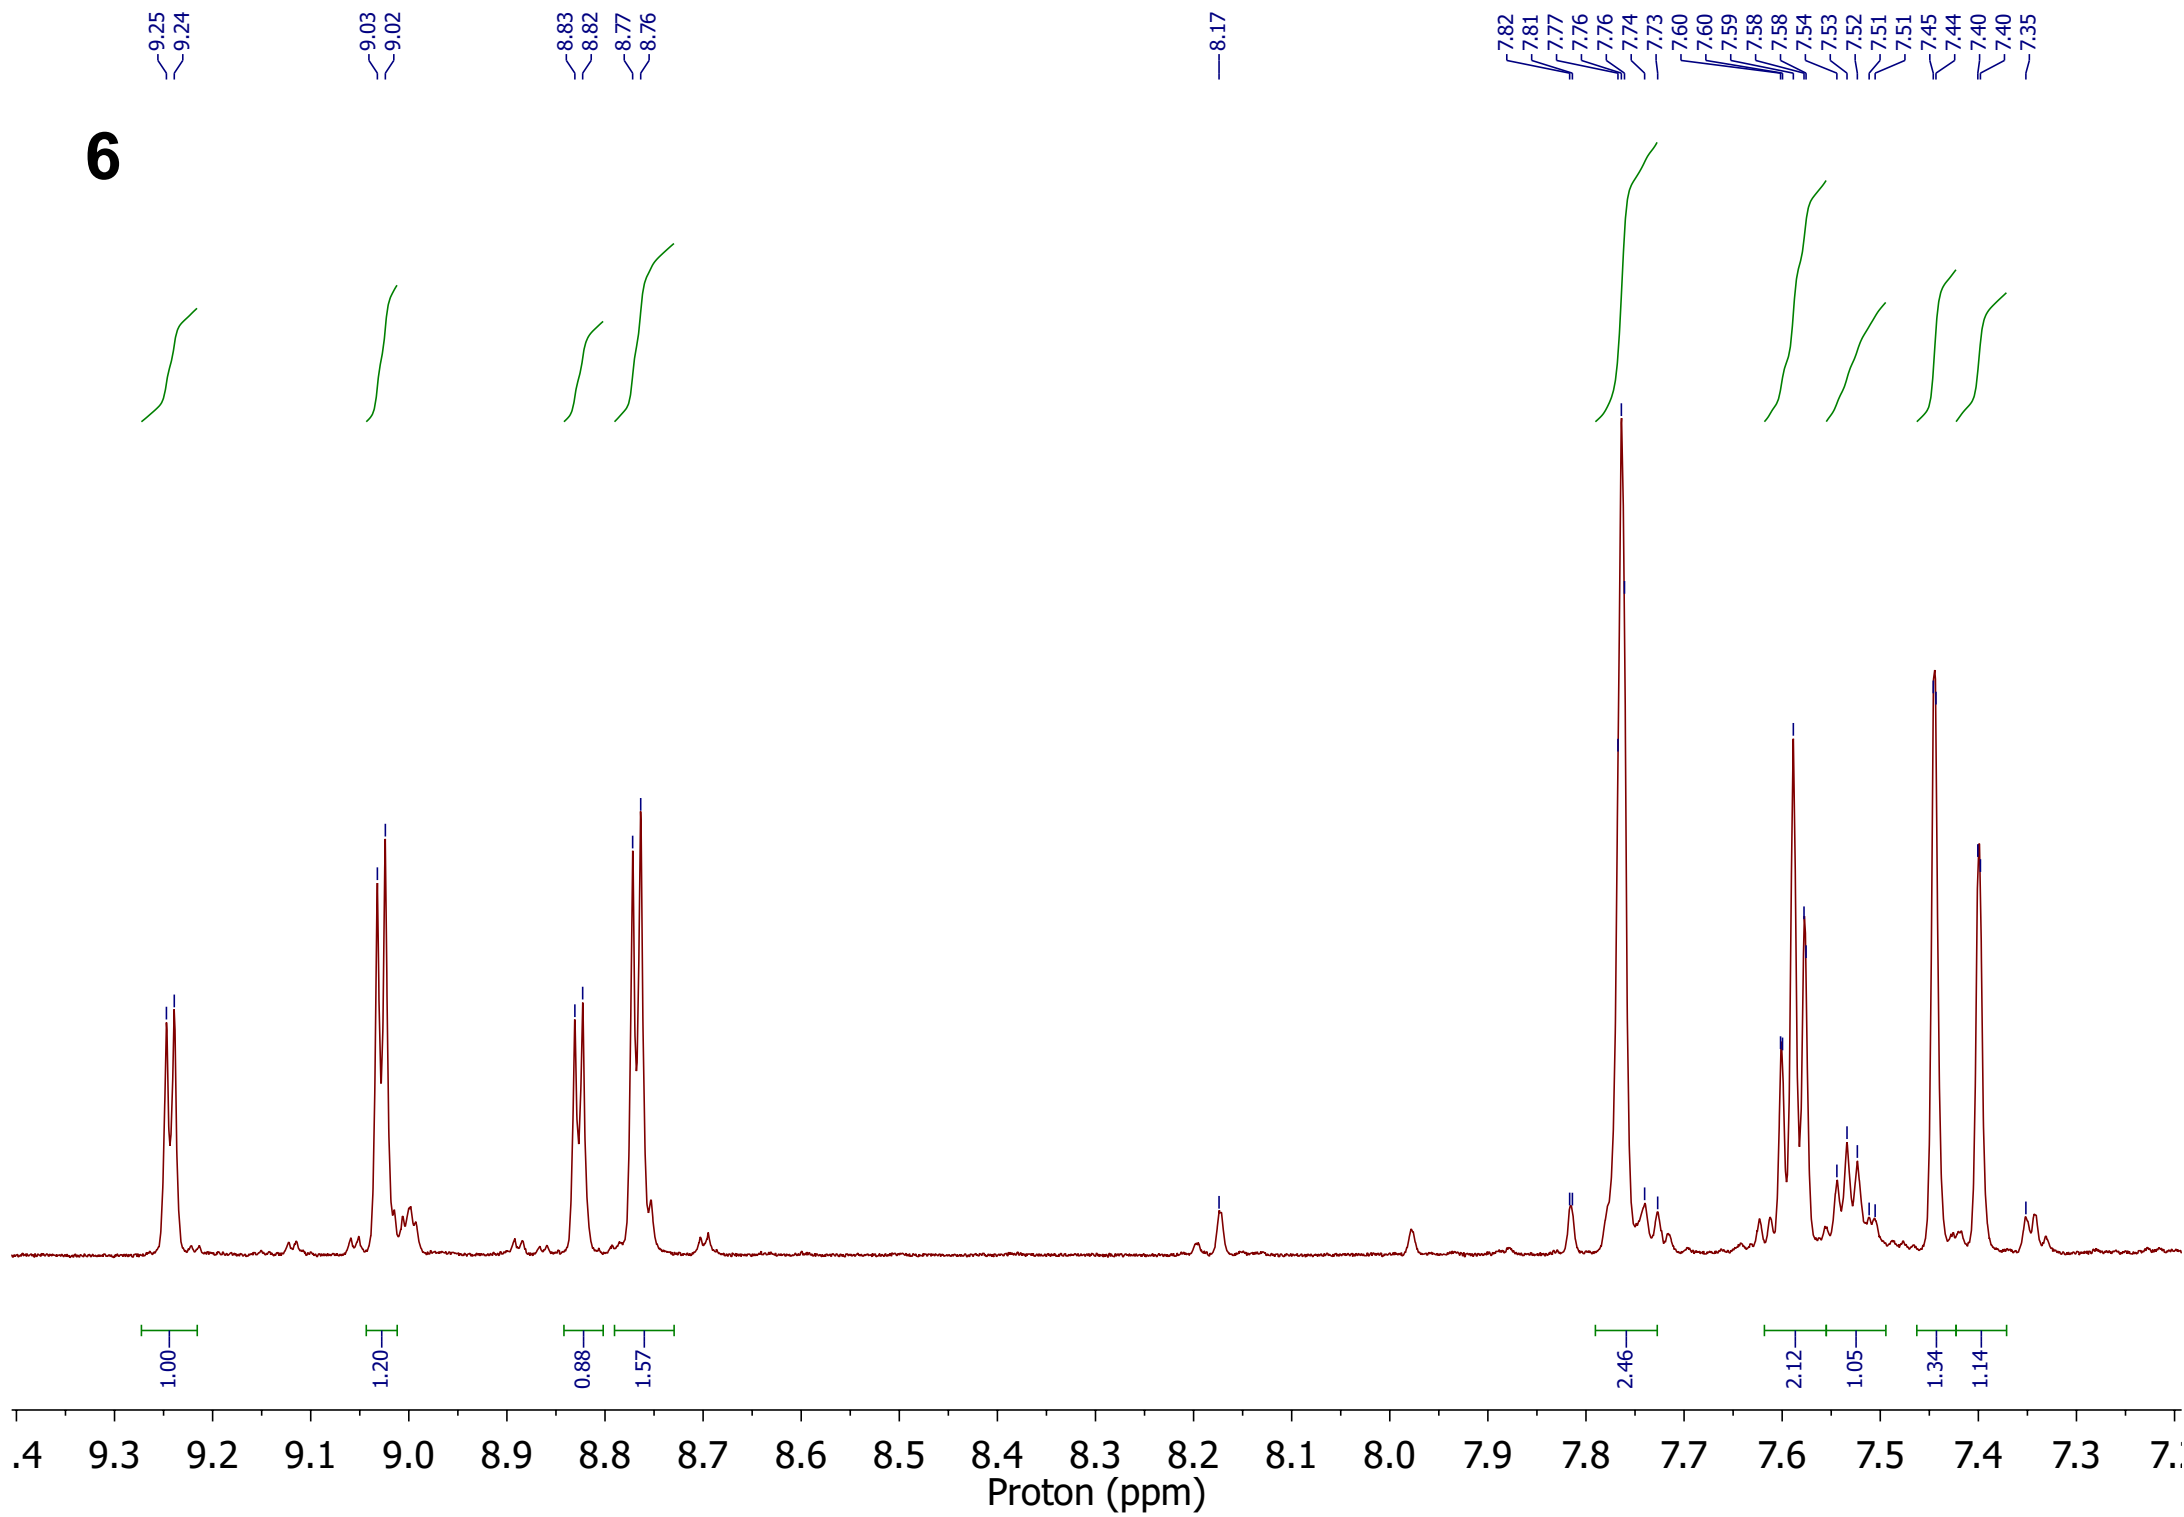

6

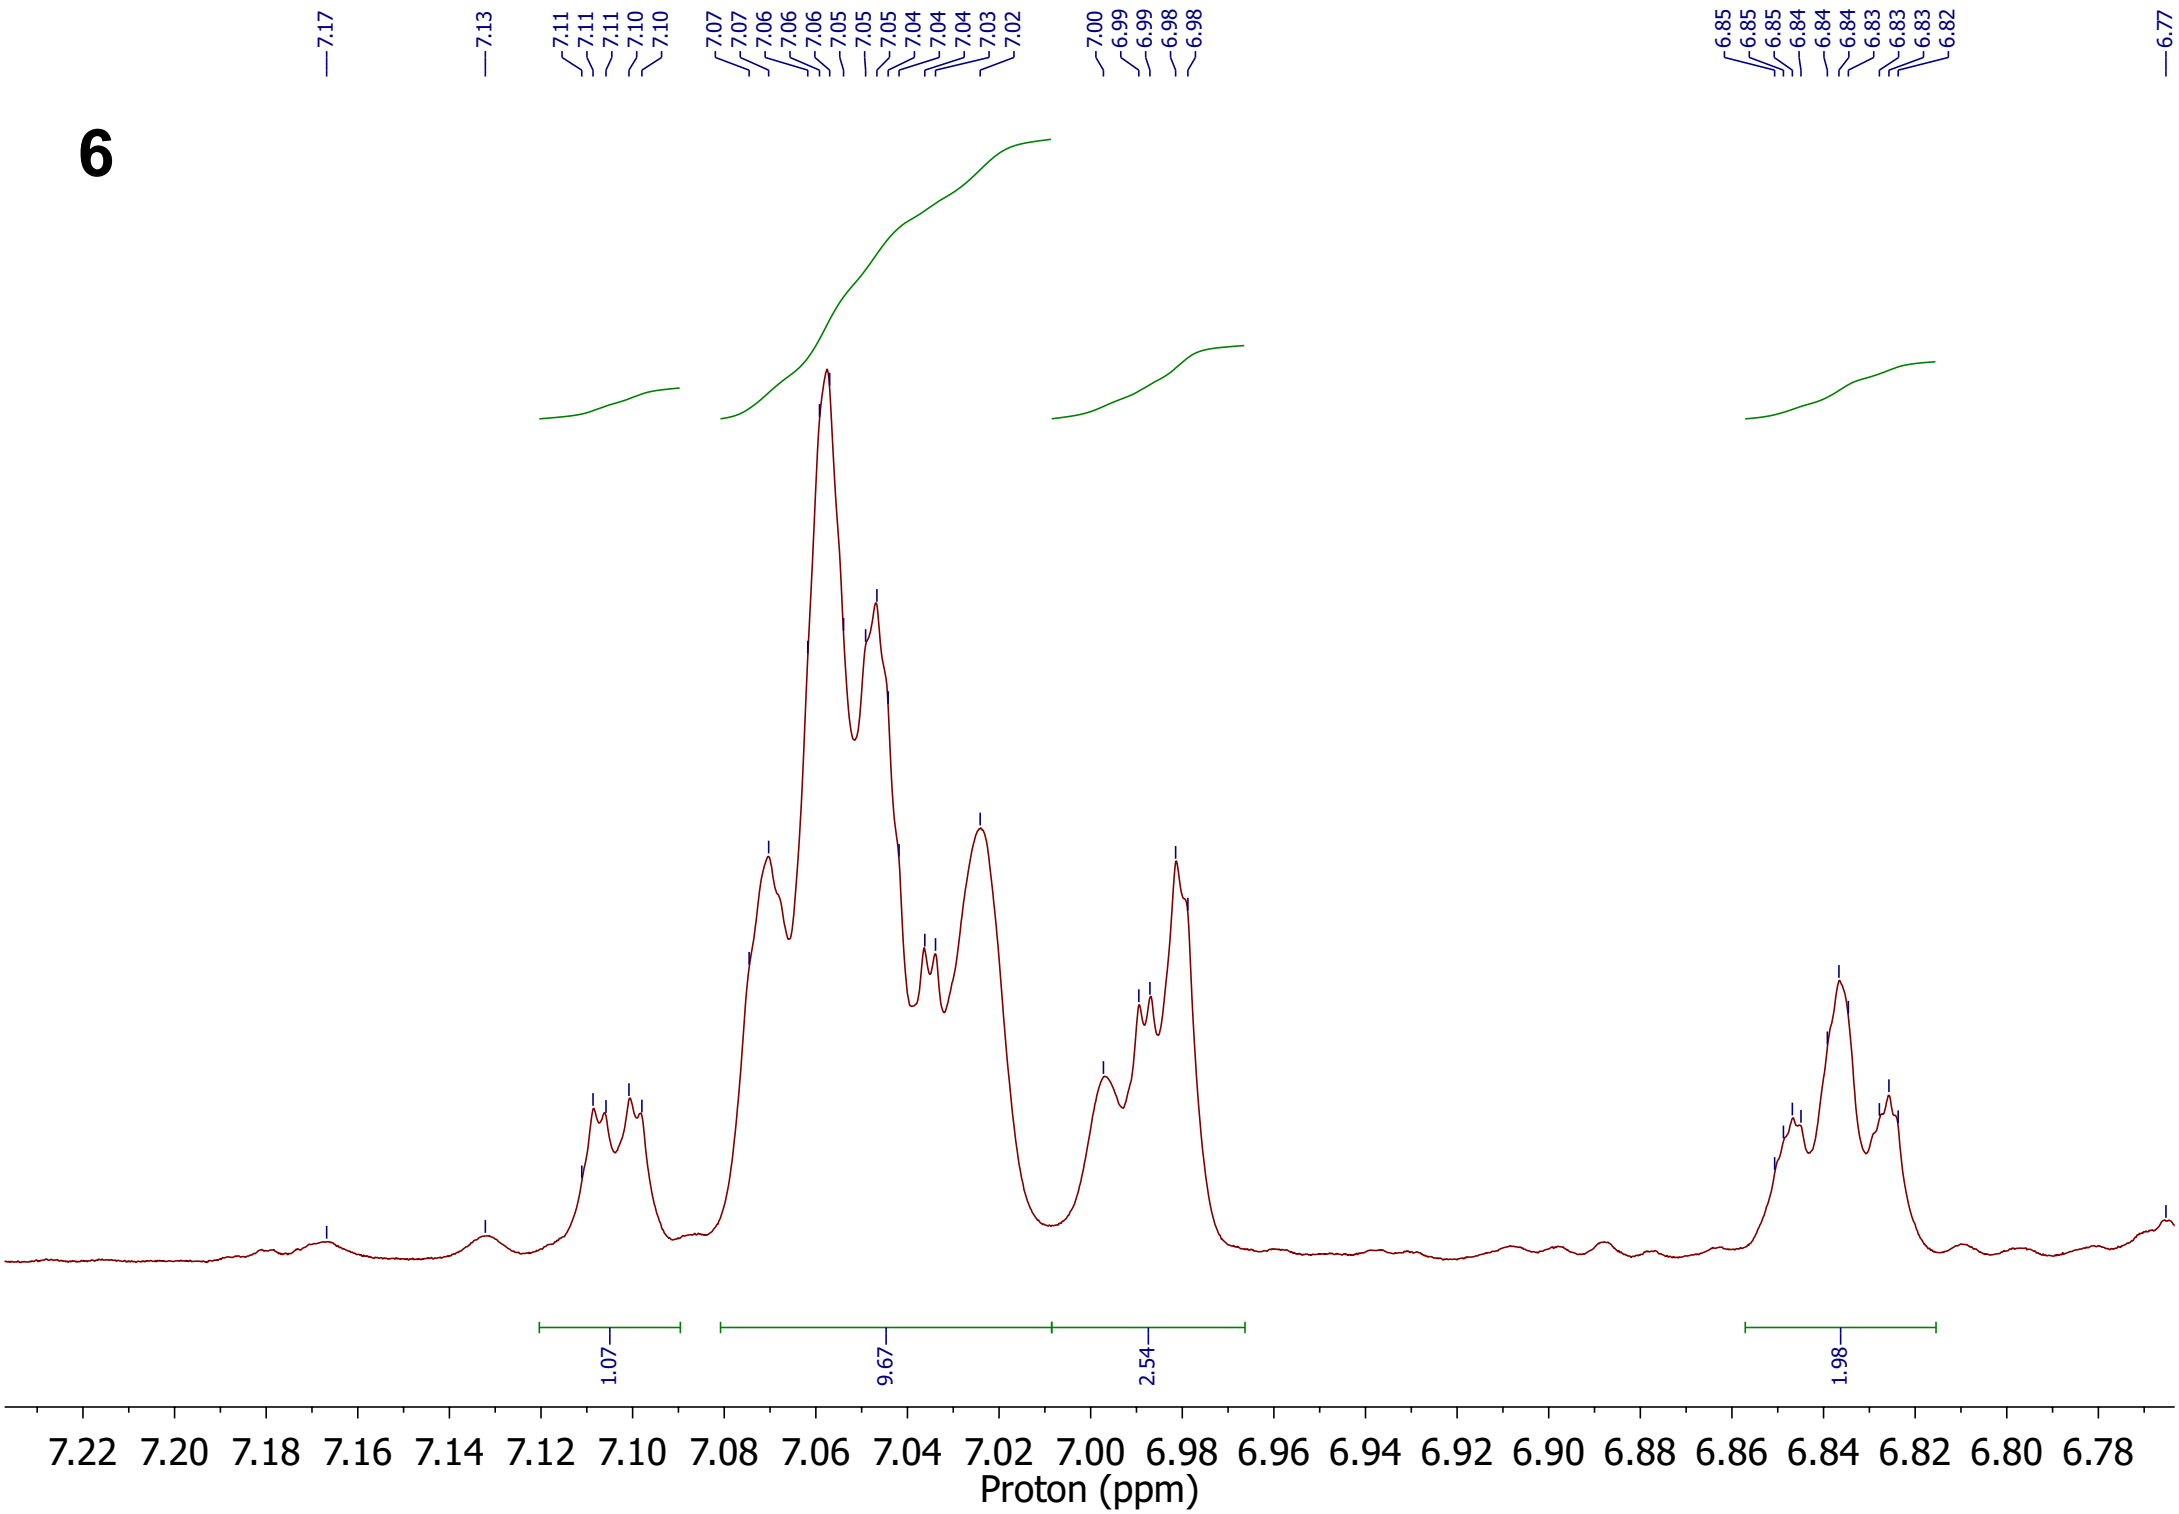

6

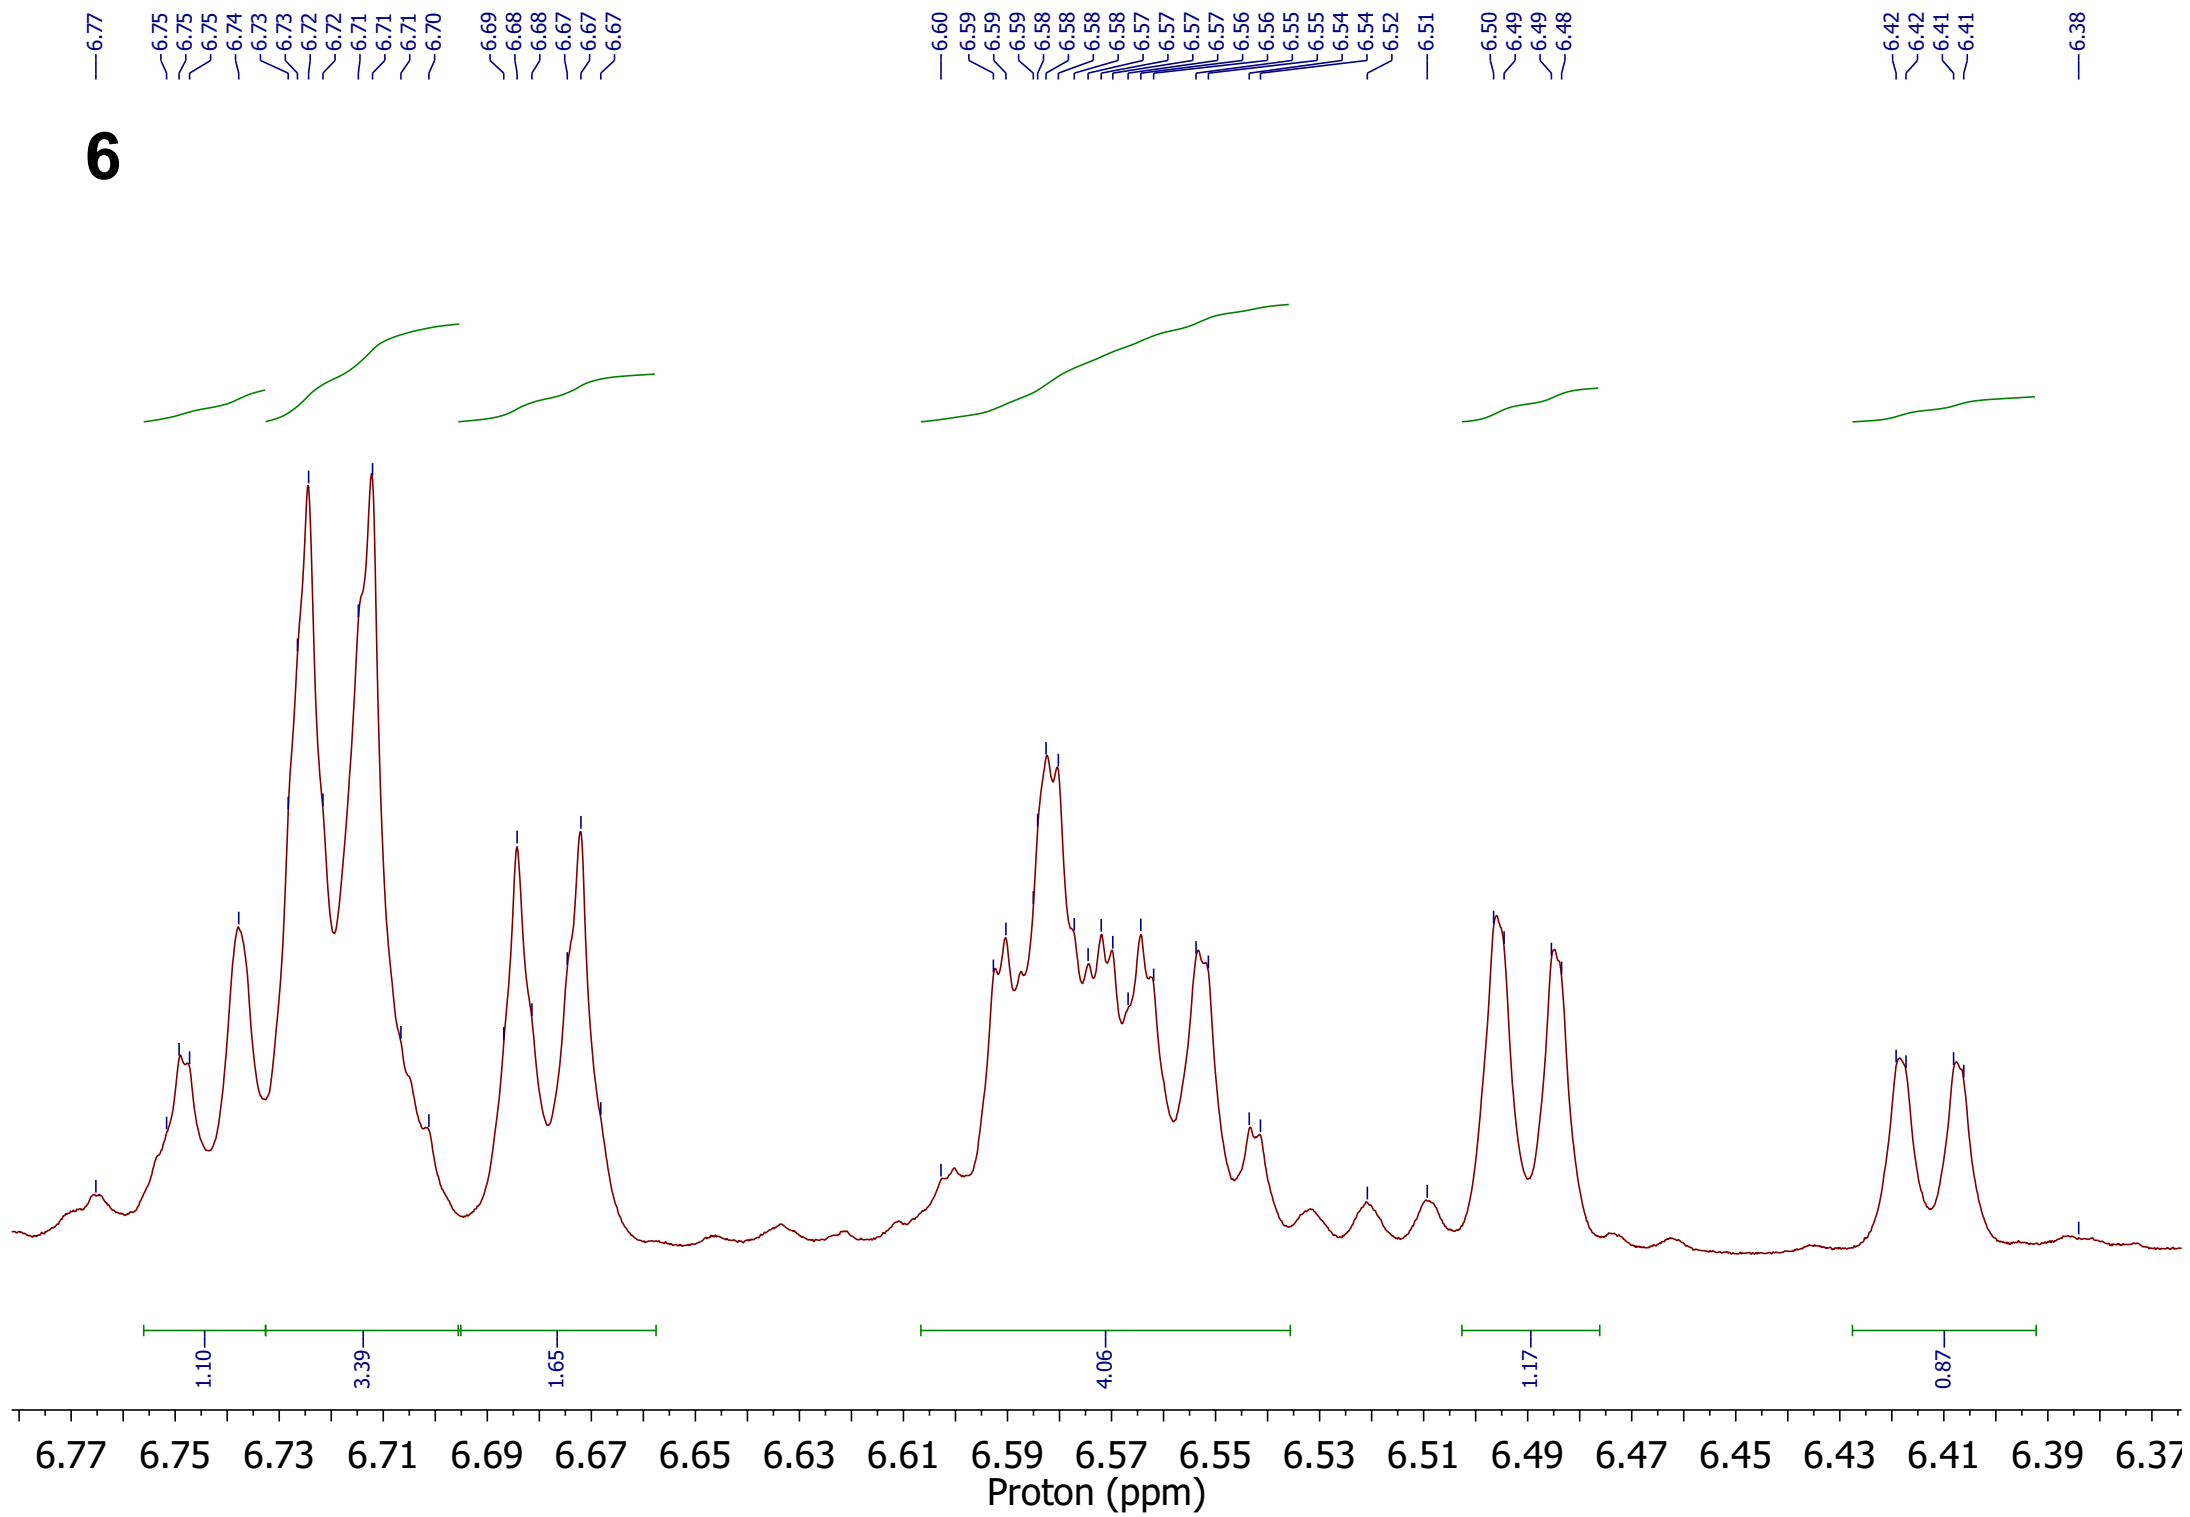

6

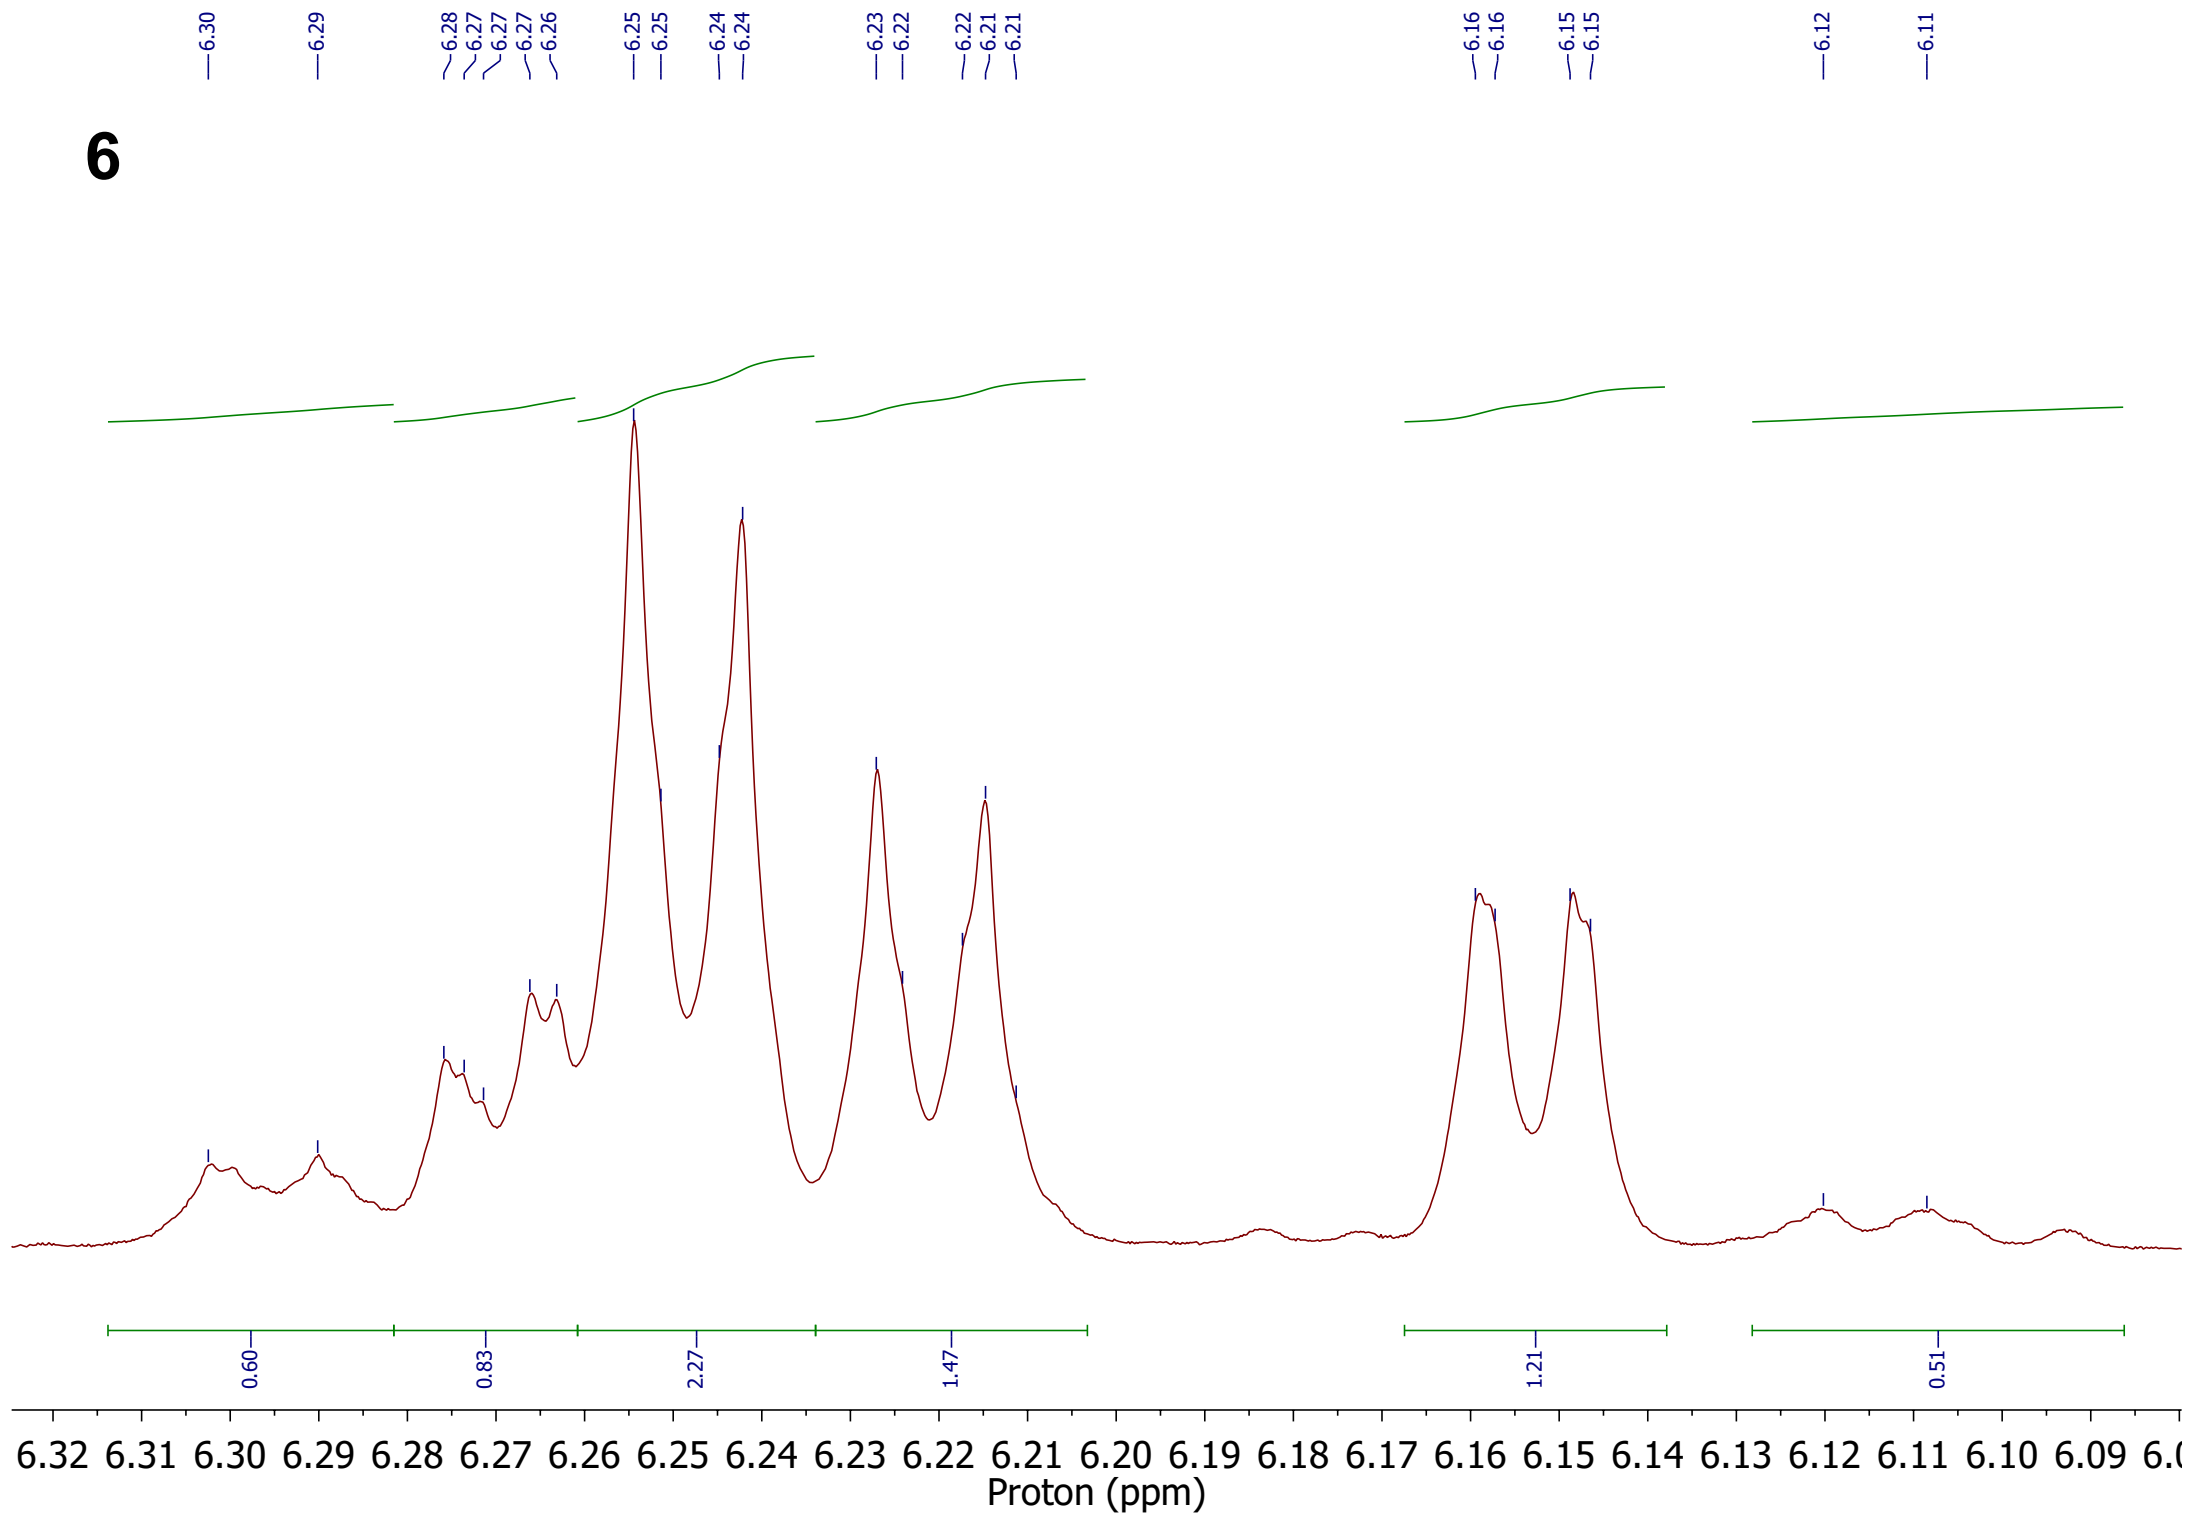

6

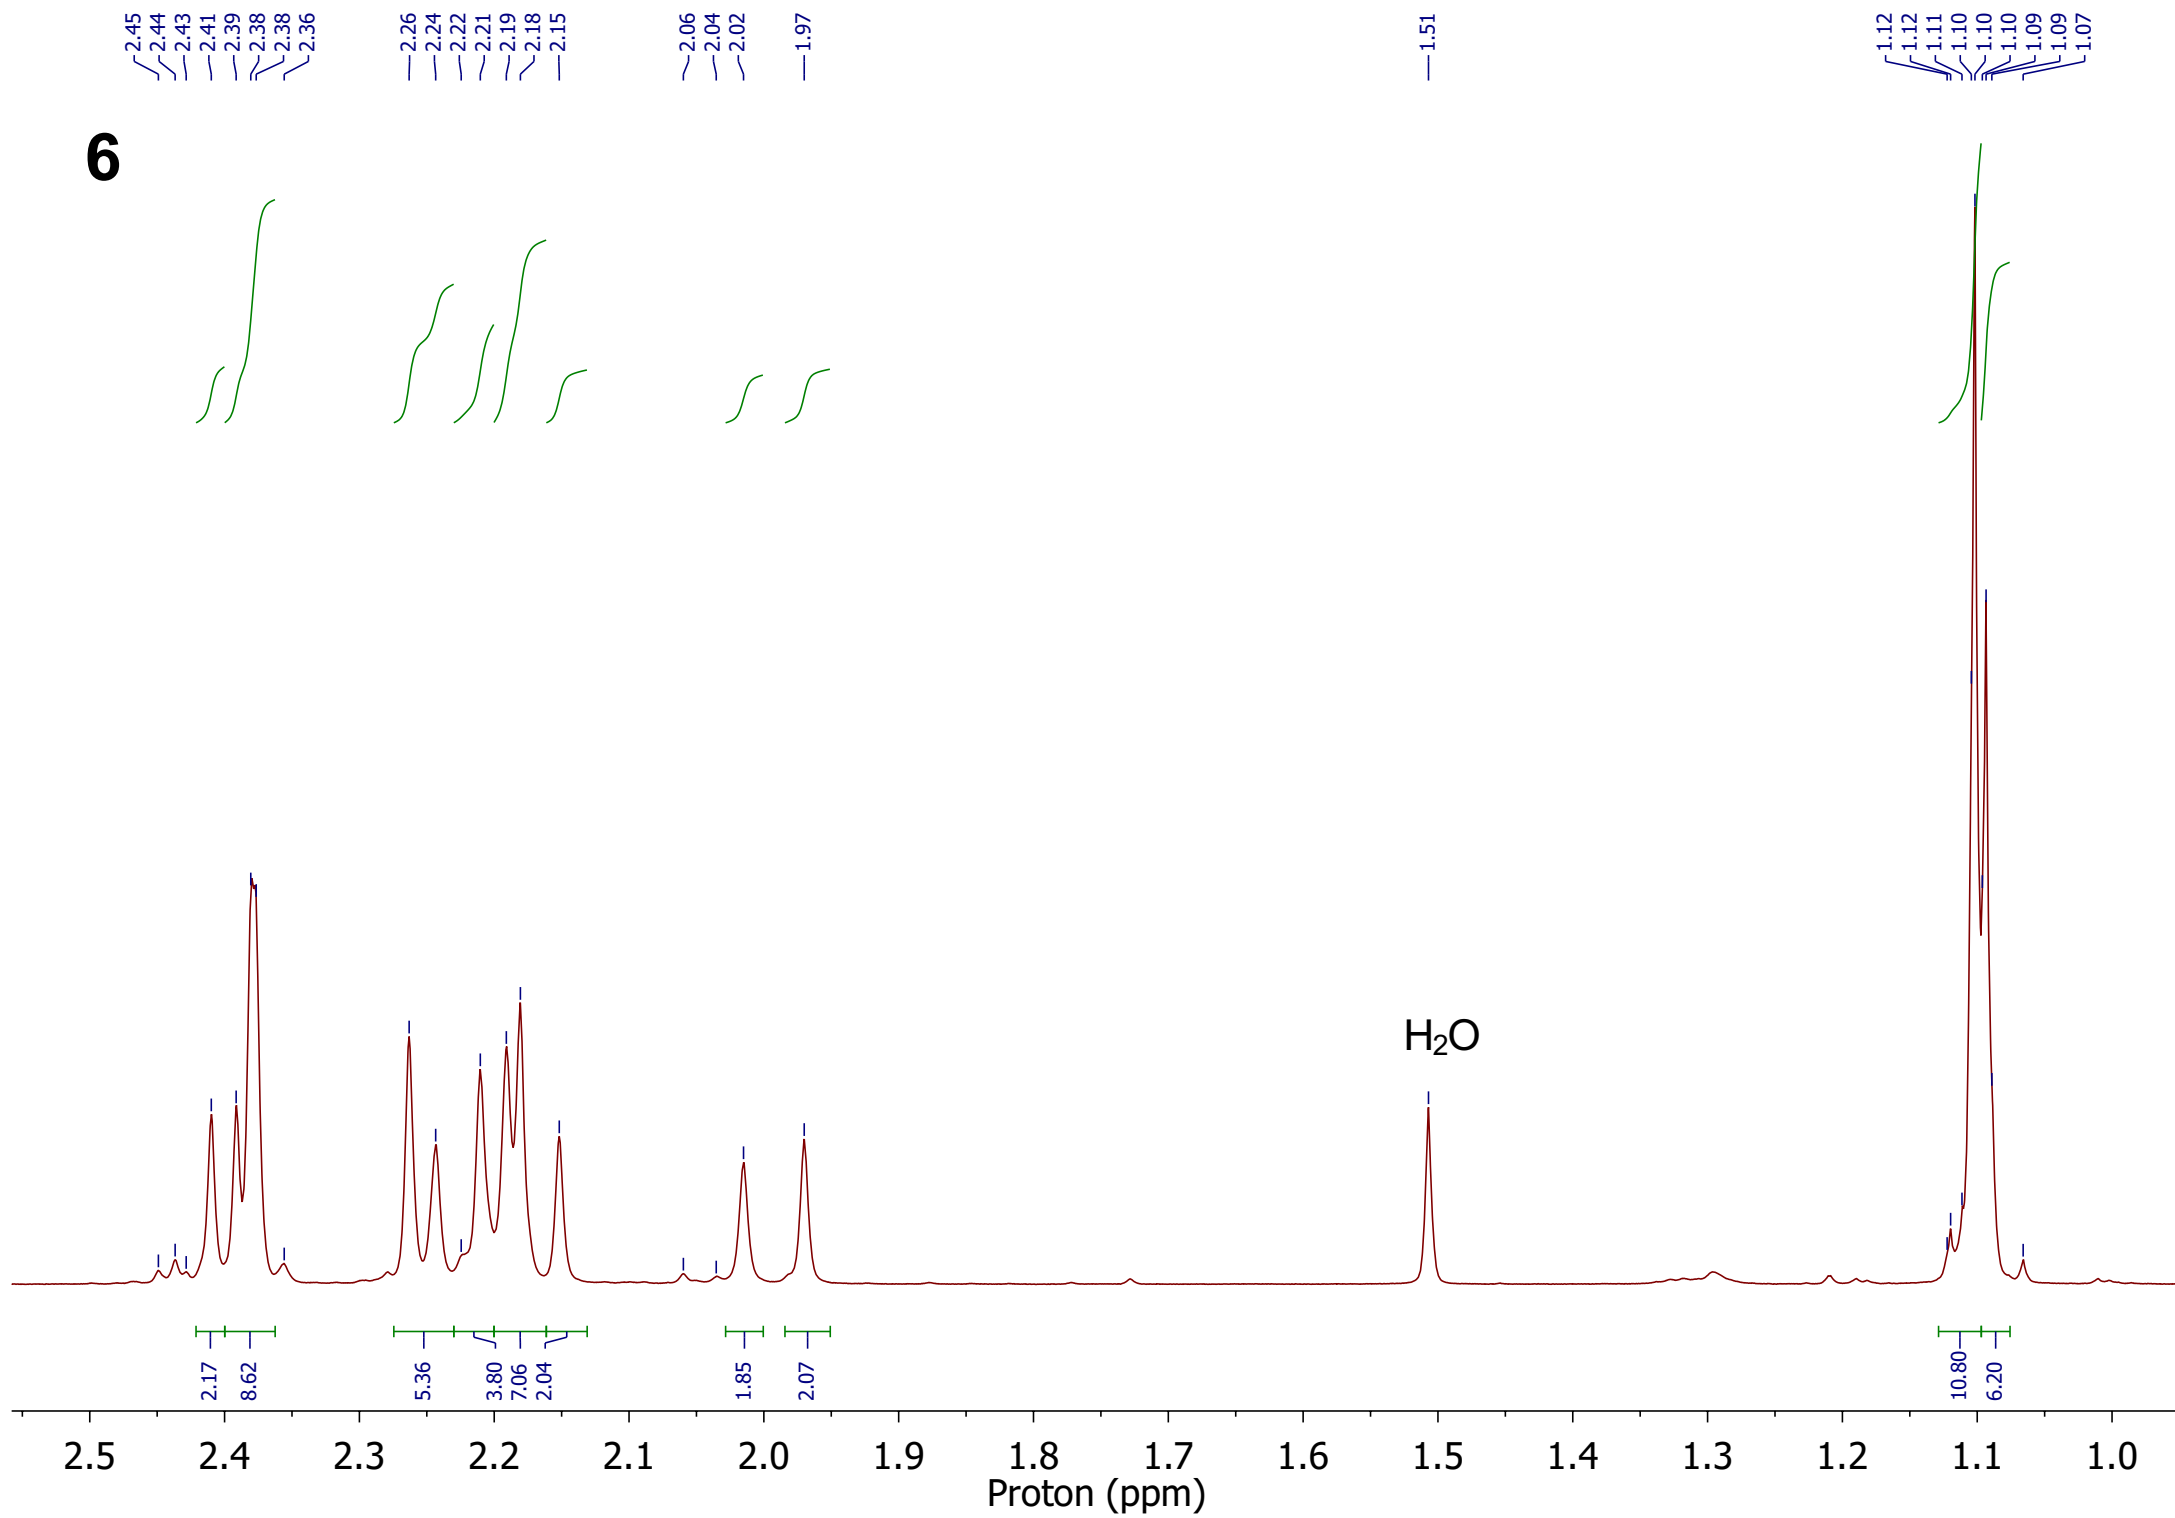

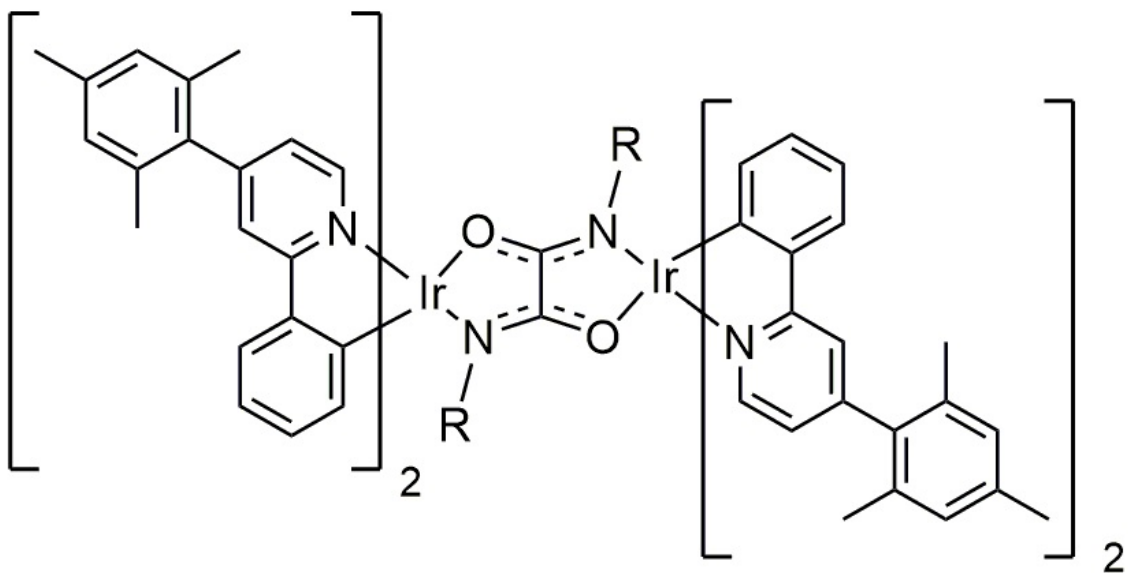

**6** R = 4-*t*Bu-C<sub>6</sub>H<sub>4</sub>

CD<sub>2</sub>Cl<sub>2</sub> at  
53.38 ppm

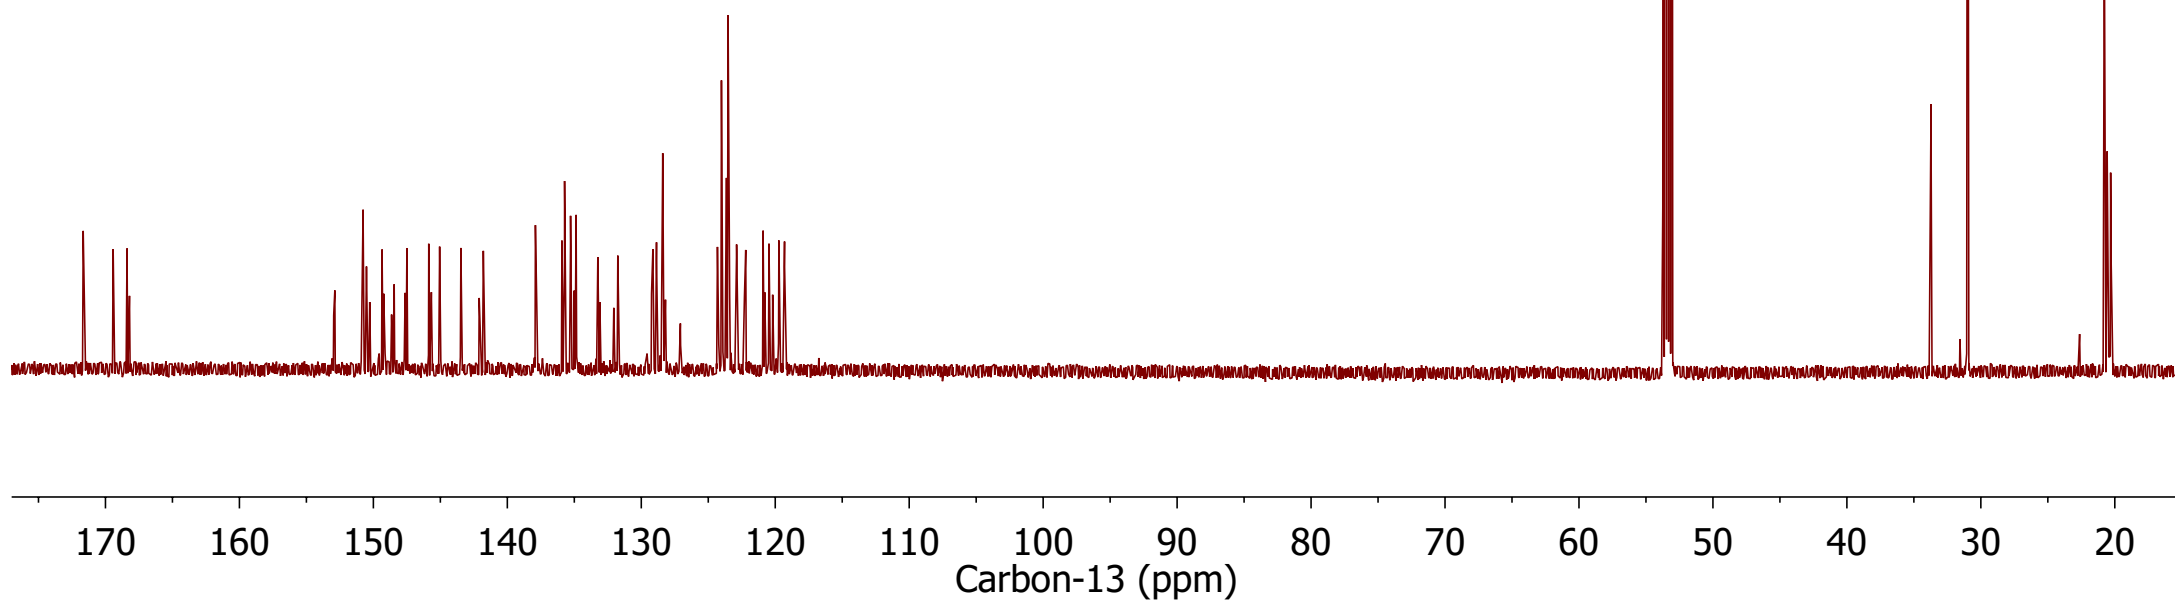

6

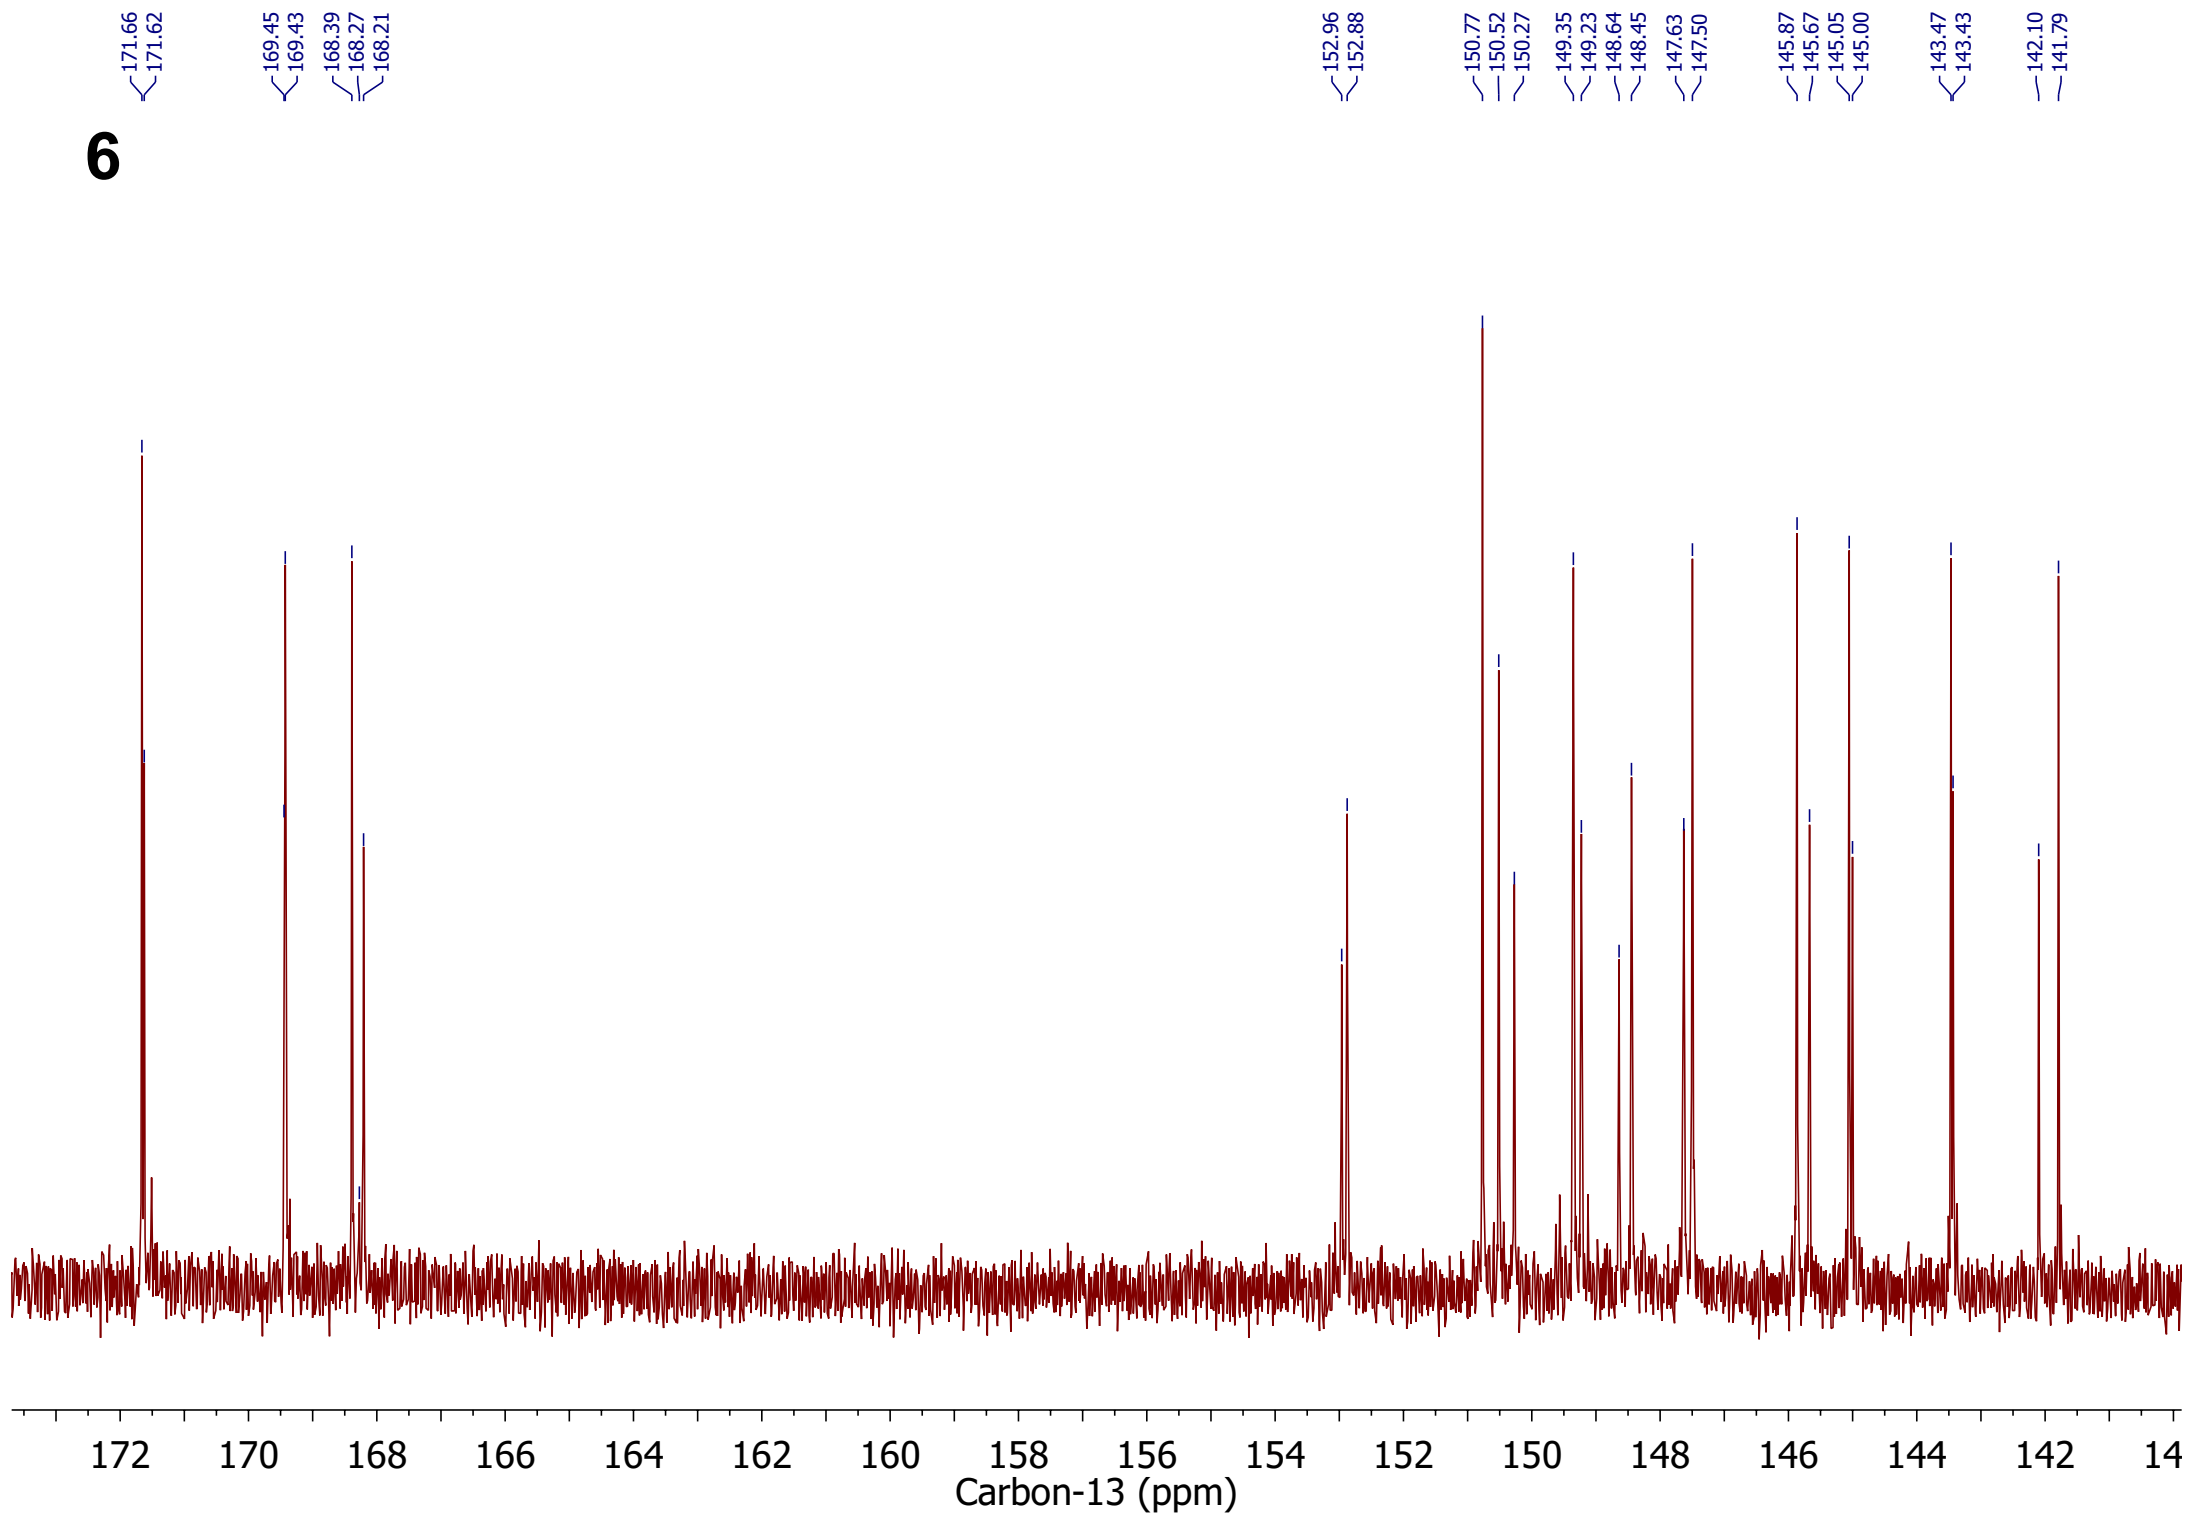

6

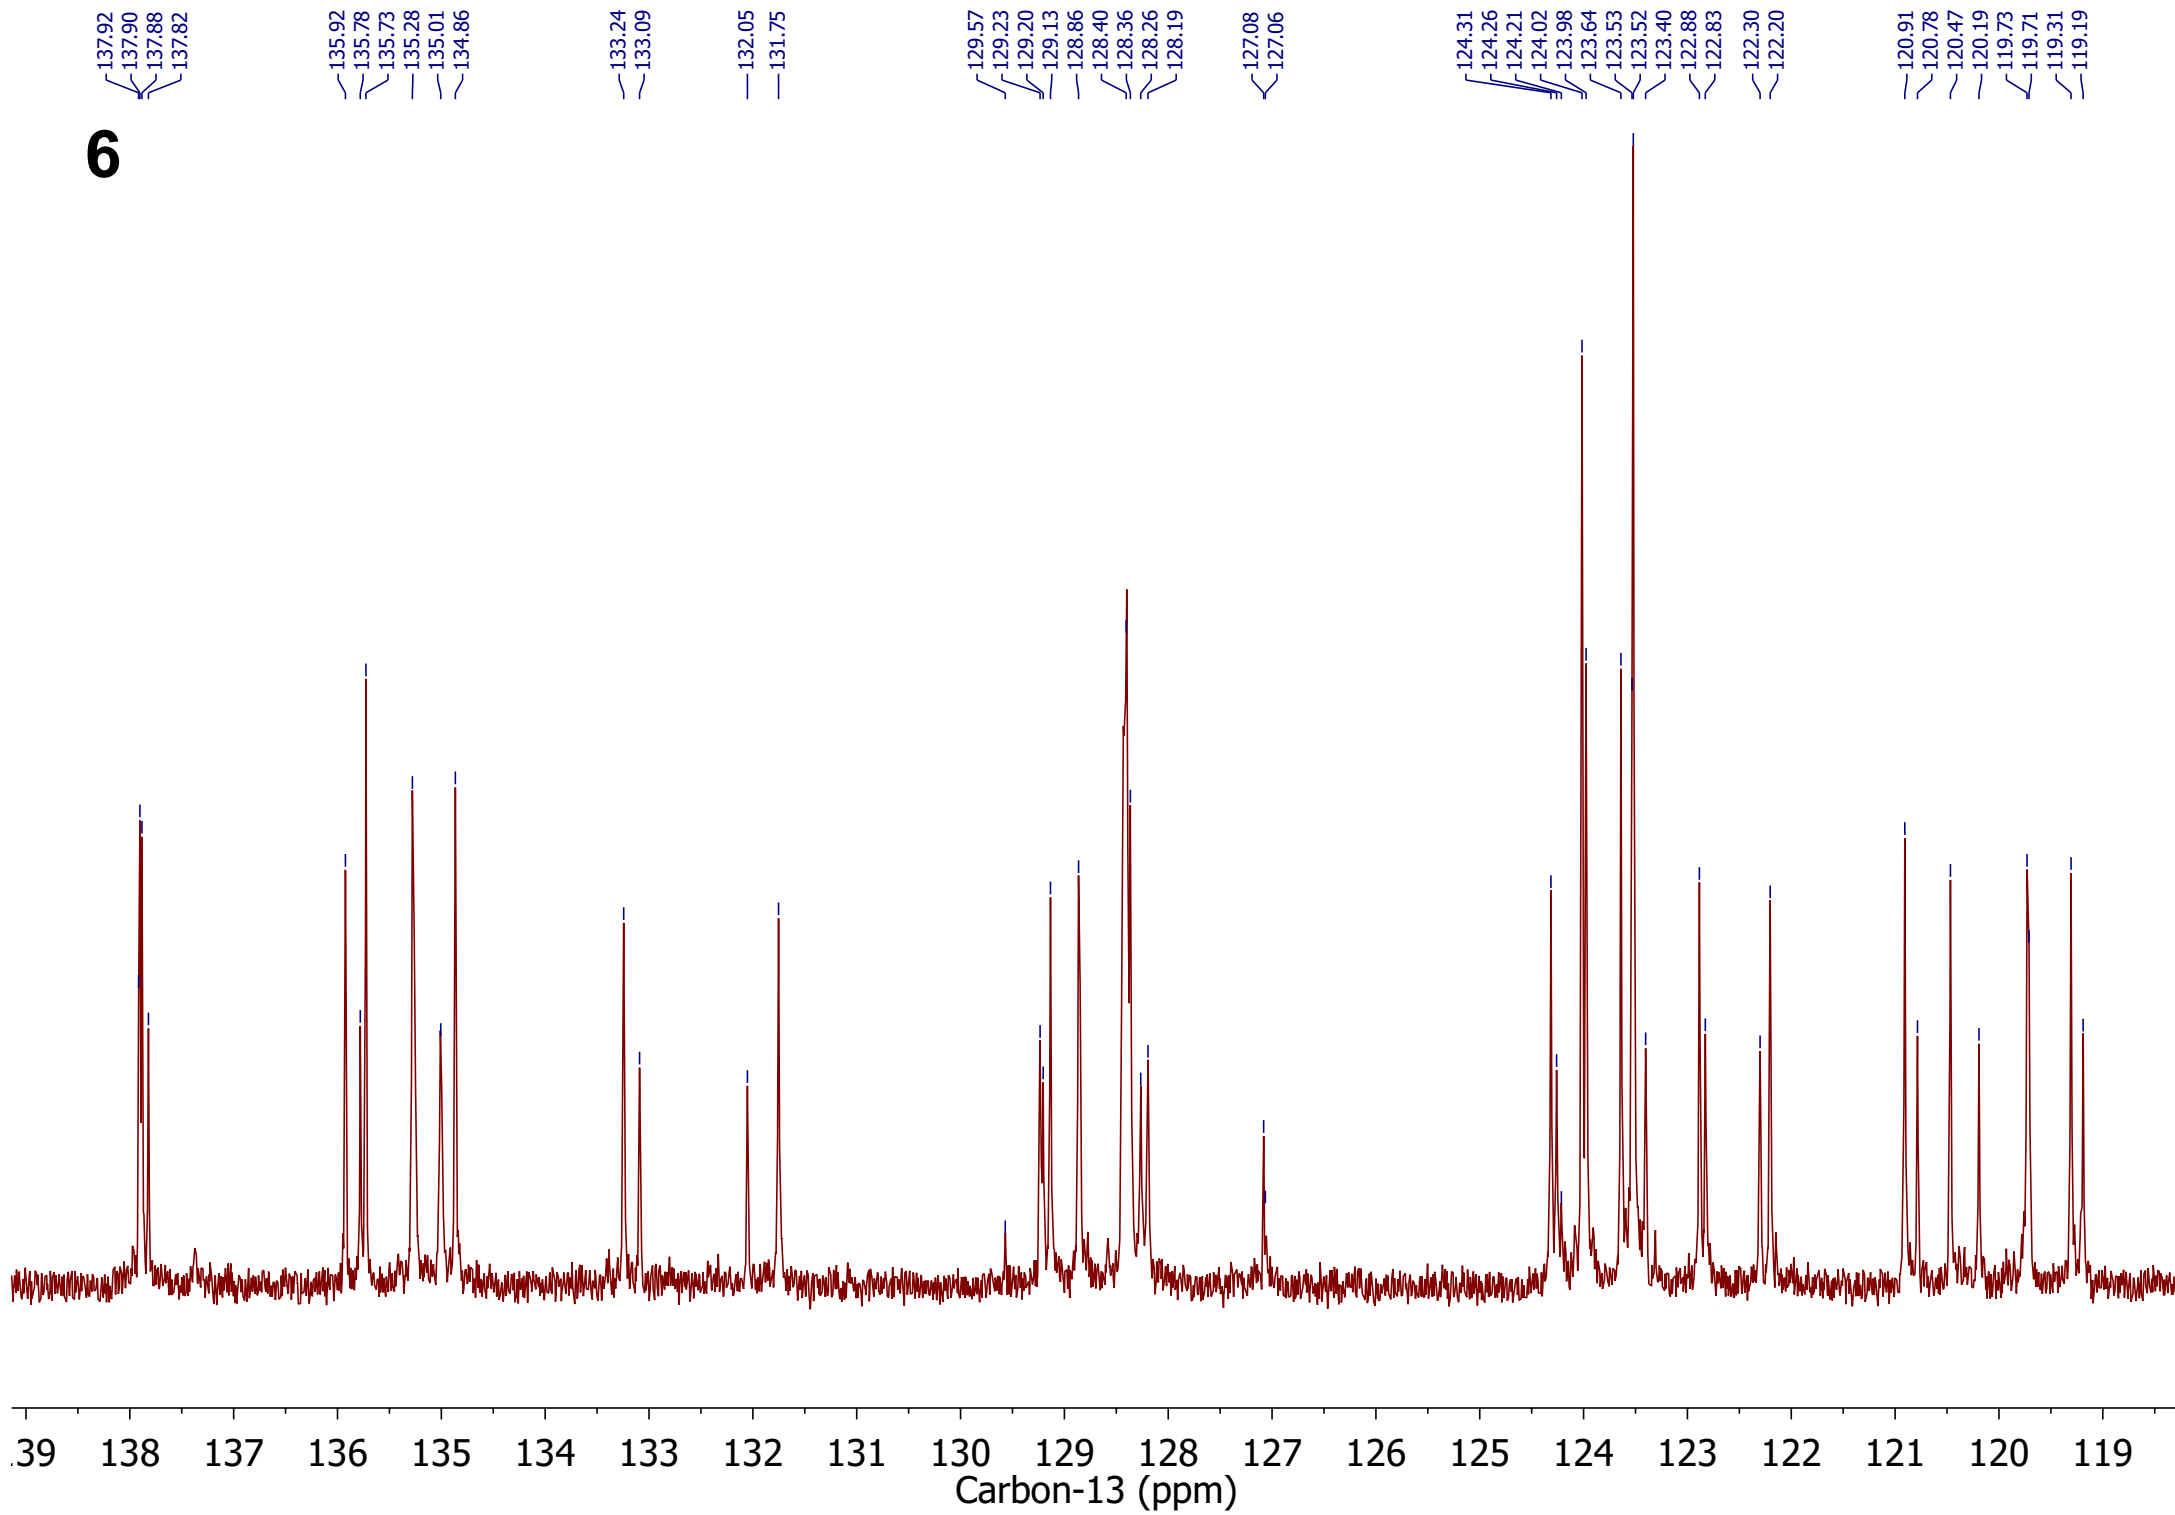



6

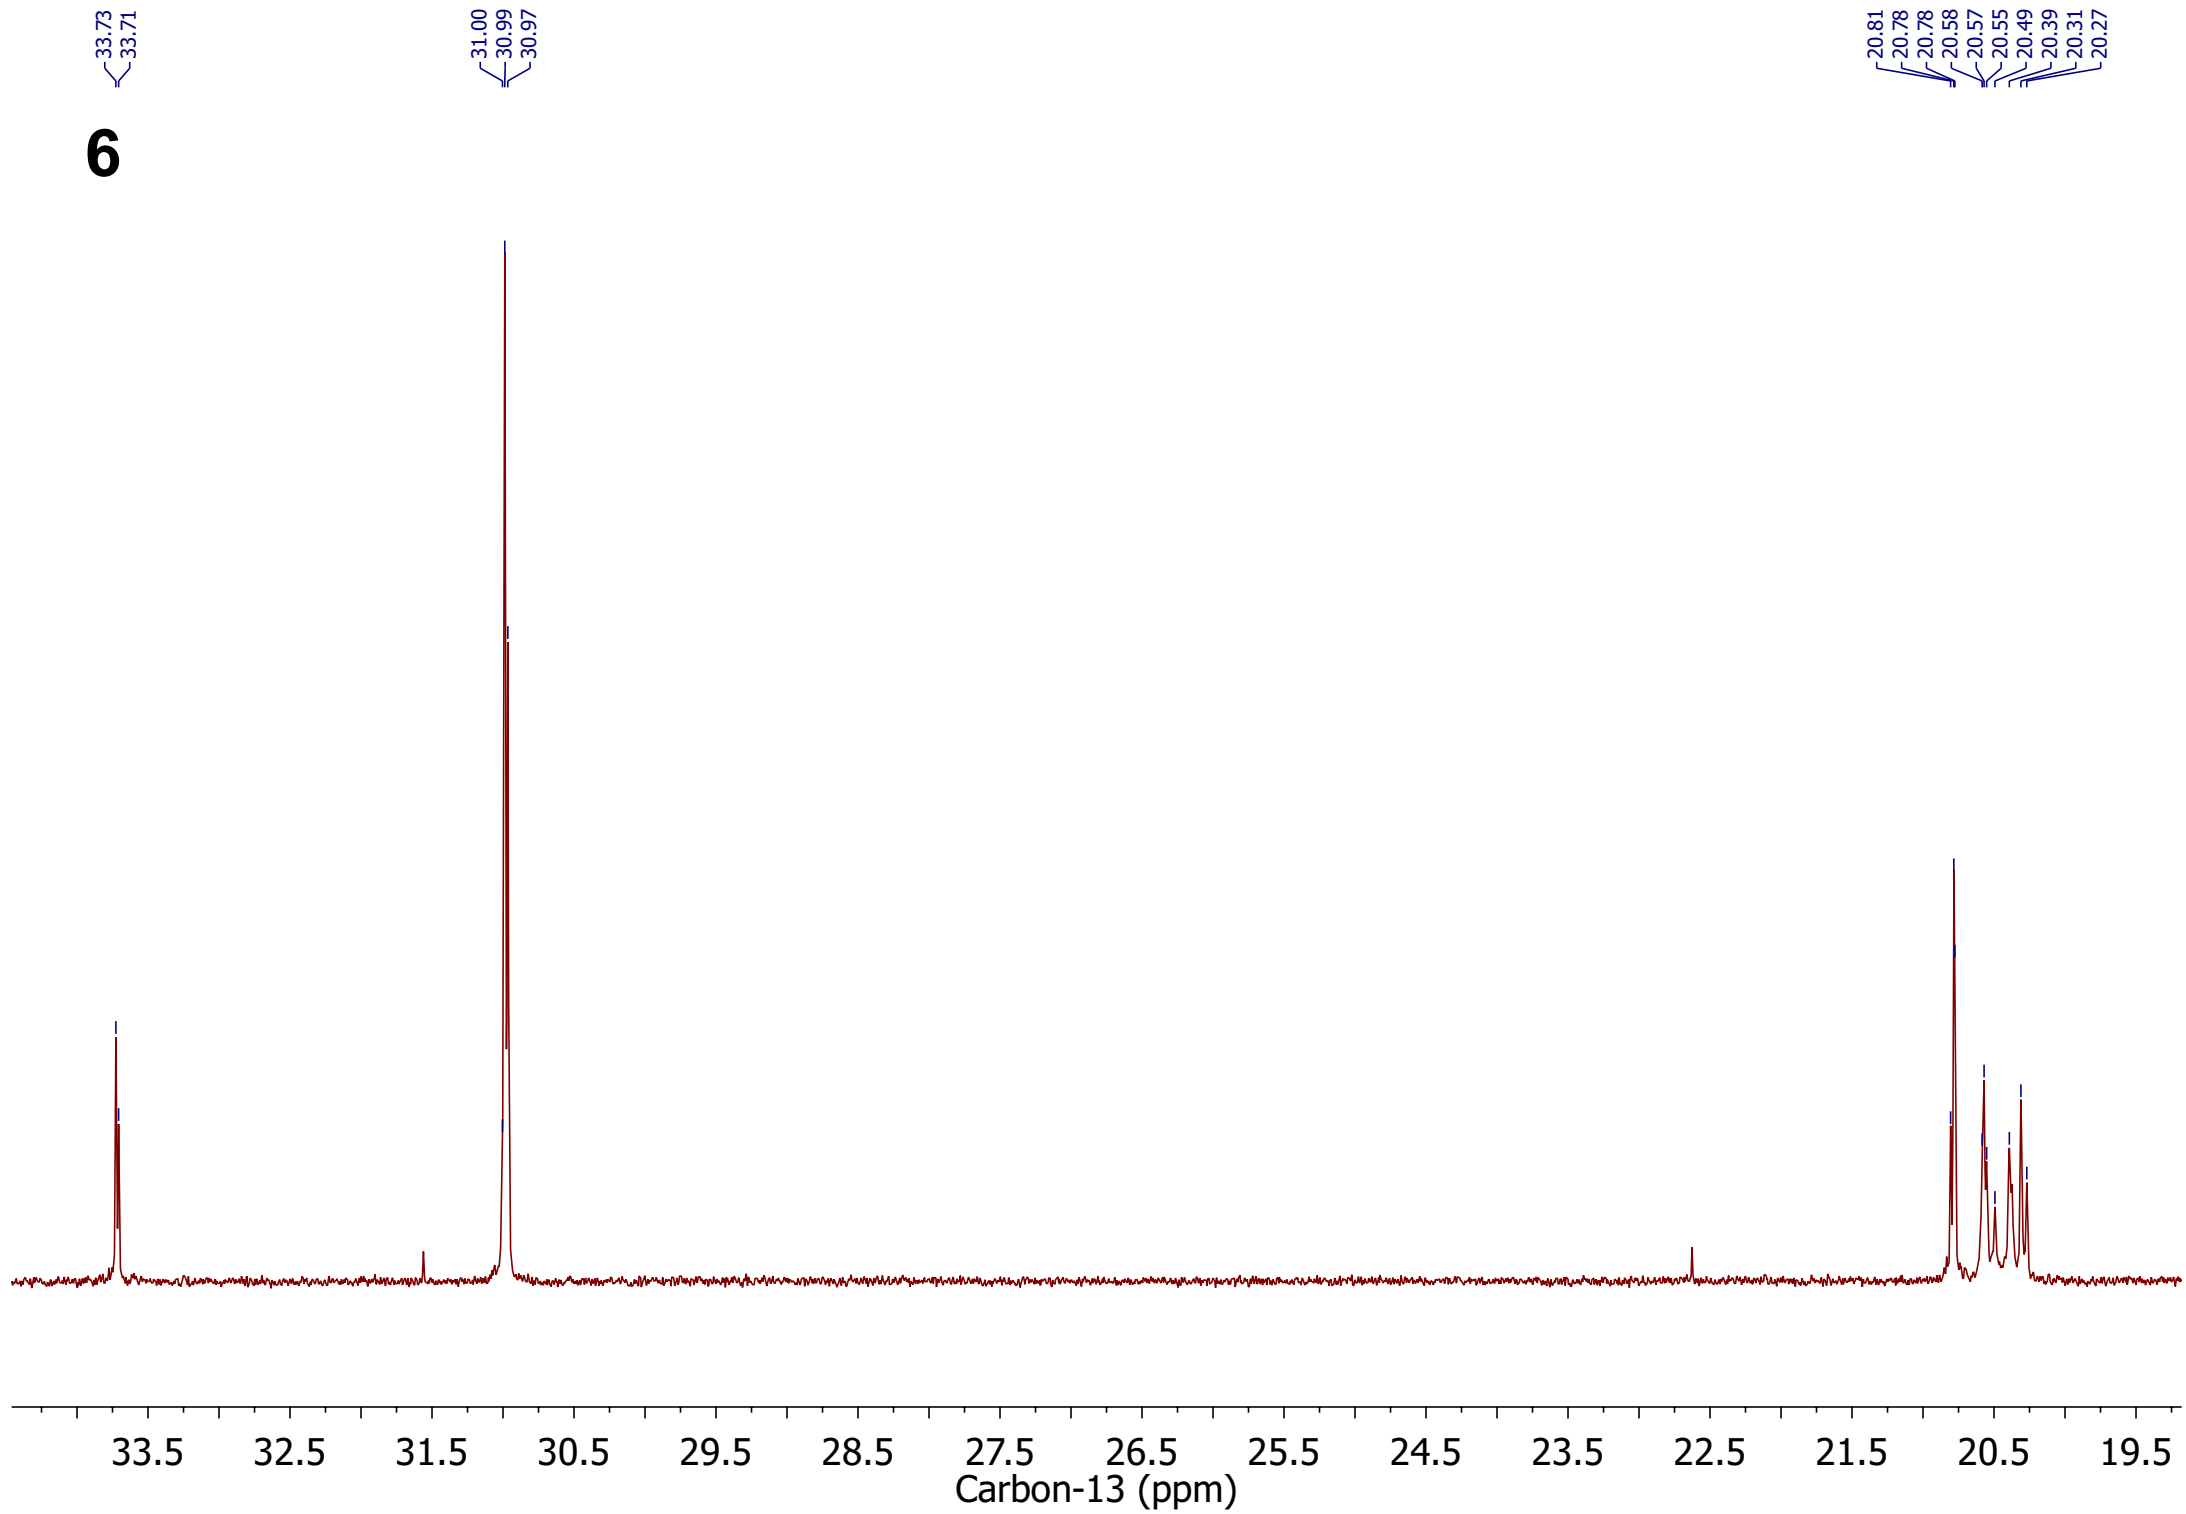

Supplement: c7tc00628d1.pdf [file c7tc00628d1.pdf]
